# Supplementary material for: Phosphonodithioester–Amine Coupling as a Key Reaction Step for the Design of Cationic Amphiphiles Used for Gene Delivery
Source: MDPI journal article supplement (doi:10.3390/molecules26247507), 2021-12-11
Supplement: s1 [file s1]

## Supporting materials

Phosphonodithioester-Amine Coupling as a key reaction to design cationic amphiphiles used for gene delivery.

Montassar Khalil<sup>a</sup>, Alexis Hocquigny,<sup>b</sup> Mathieu Berchel,<sup>a</sup> Tristan Montier,<sup>b</sup> Paul-Alain Jaffrès<sup>a</sup>

### Summary

|                                               |    |
|-----------------------------------------------|----|
| 1. Analysis (NMR, IR, Masse) .....            | 2  |
| 2. Stability of the liposomes .....           | 21 |
| 3. DLS and zeta potential of lipoplexes ..... | 22 |
| 4. Gel electrophoresis.....                   | 23 |

# 1. Analysis (NMR, IR, Masse)

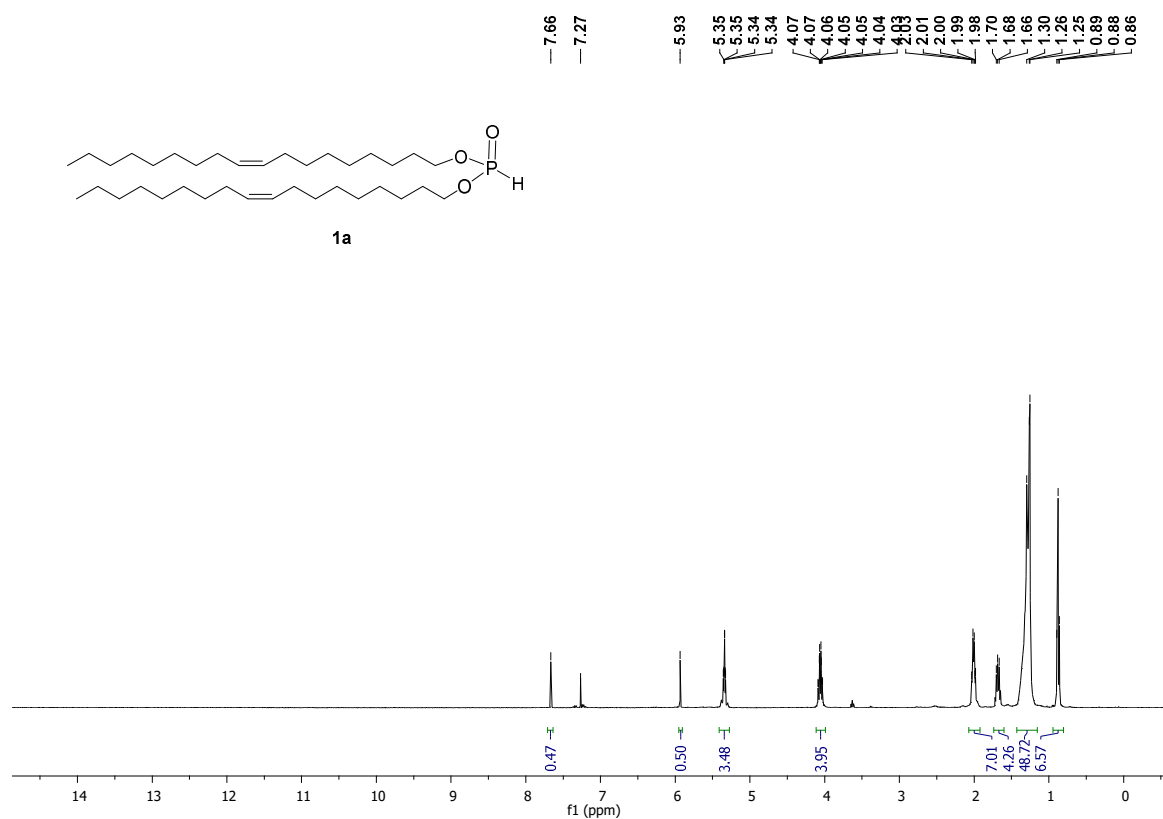

Figure S1.  $^1\text{H}$  NMR (CDCl<sub>3</sub>) of compound **1a**

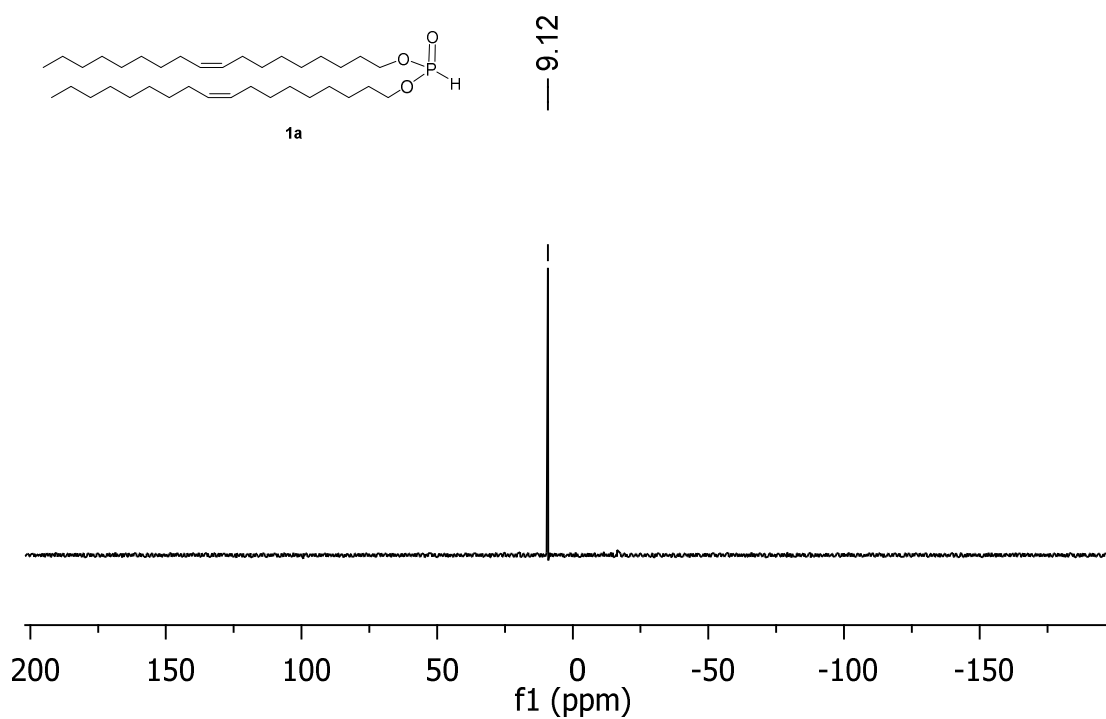

Figure S2.  $^{31}\text{P}$  { $^1\text{H}$ } (CDCl<sub>3</sub>) of compound **1a**

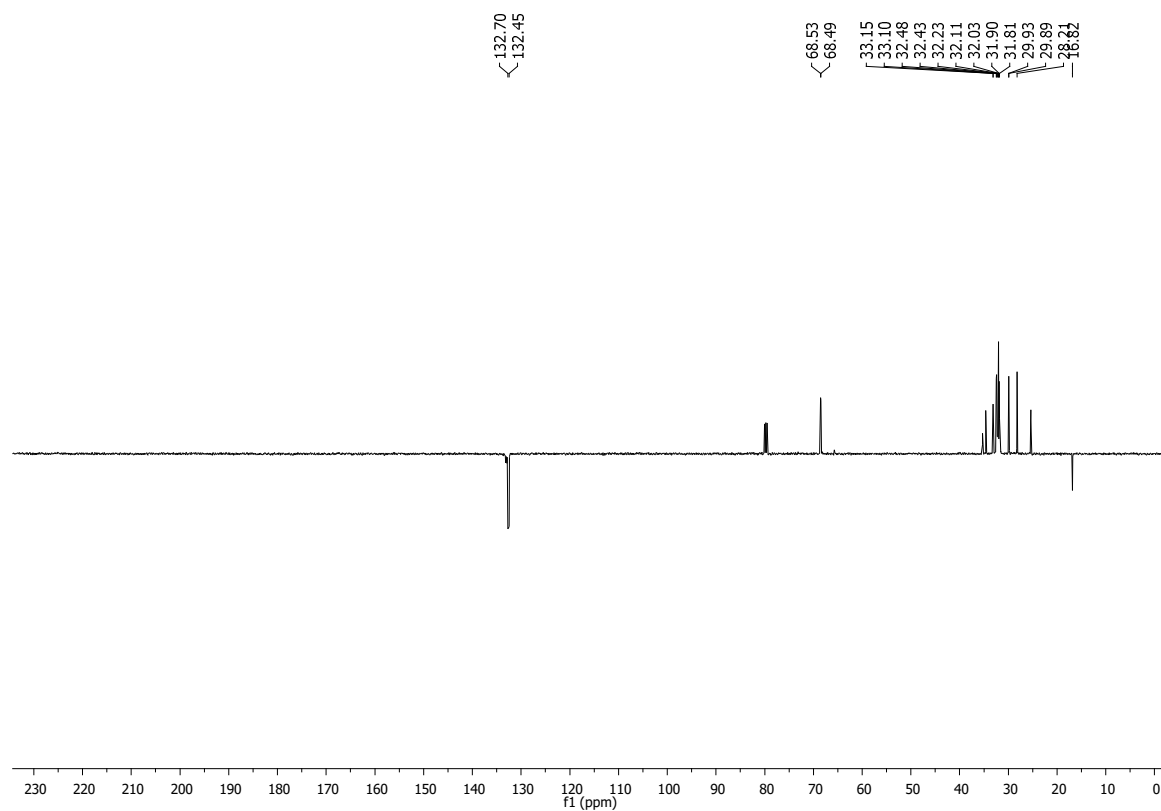

**Figure S3.** <sup>13</sup>C {<sup>1</sup>H} (CDCl<sub>3</sub>) of compound **1a**

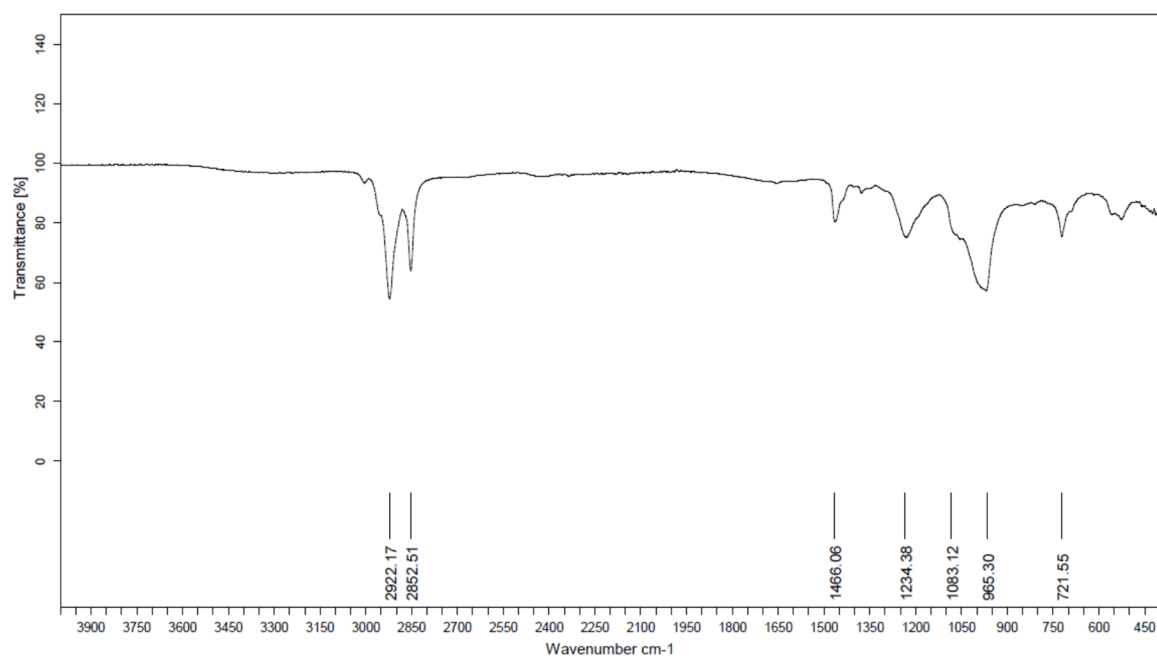

**Figure S4.** IR (ATR) of compound **1a**

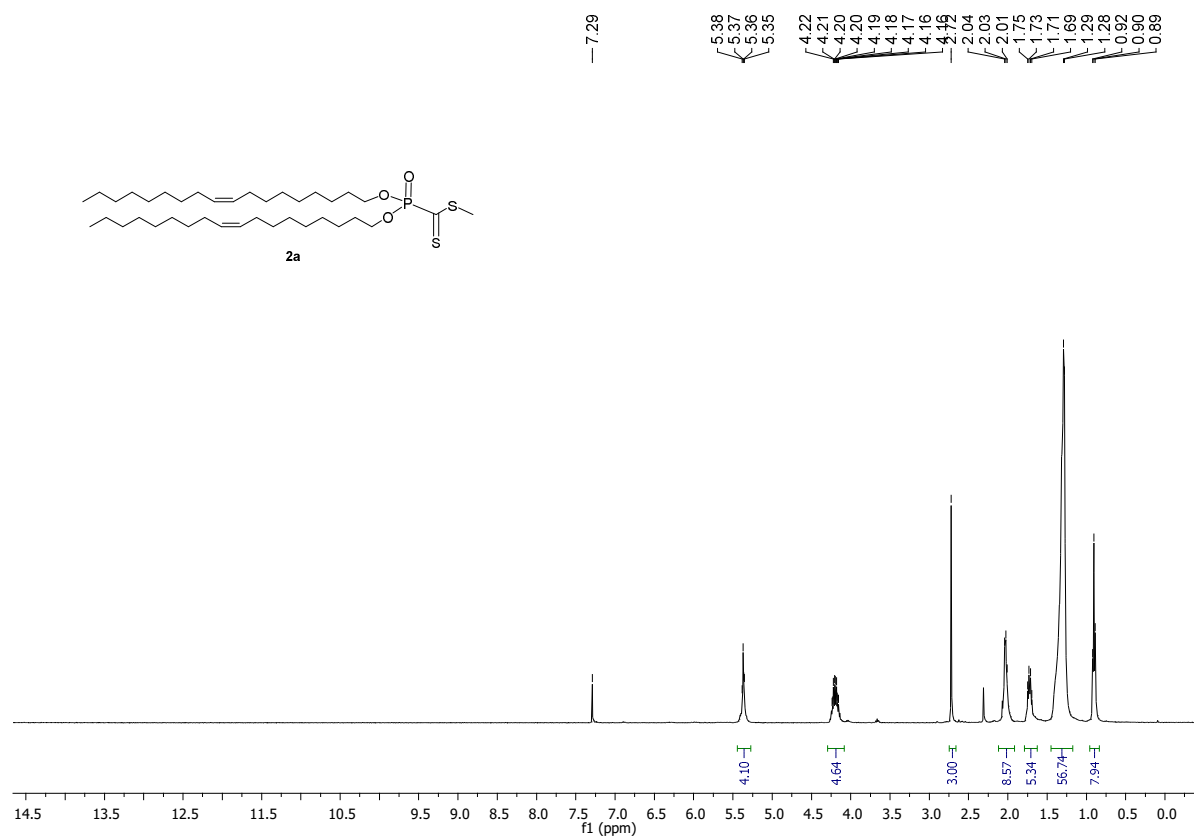

Figure S5. <sup>1</sup>H NMR (CDCl<sub>3</sub>) of compound **2a**

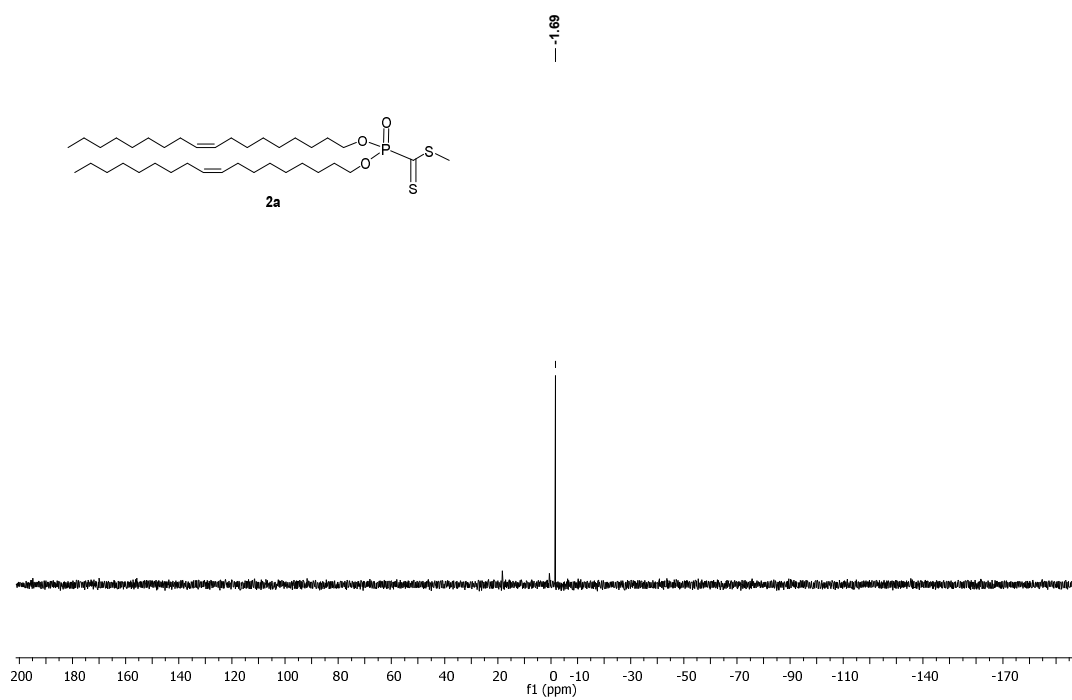

Figure S6. <sup>31</sup>P {<sup>1</sup>H} (CDCl<sub>3</sub>) of compound **2a**

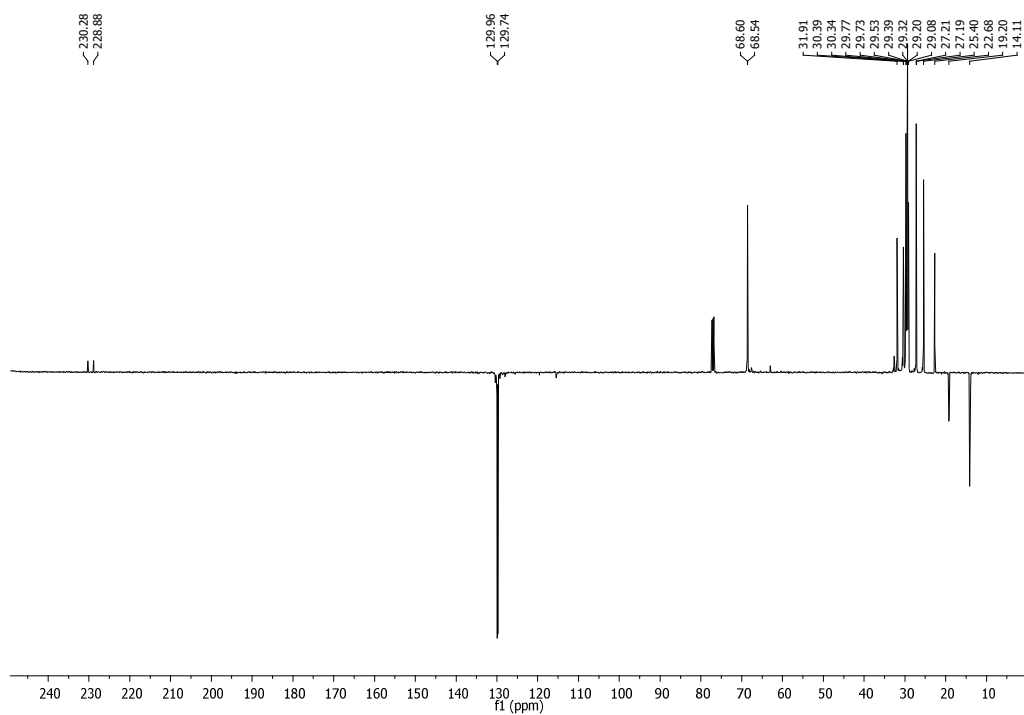

**Figure S7.**  $^{13}\text{C}$   $\{^1\text{H}\}$  ( $\text{CDCl}_3$ ) of compound **2a**

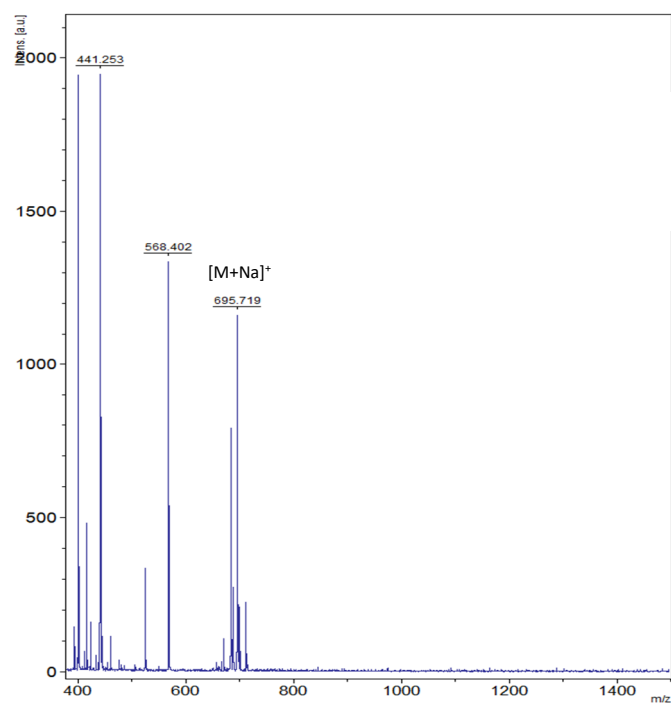

**Figure S8.** MALDI-TOF (matrix : HCCA) of compound **2a**.

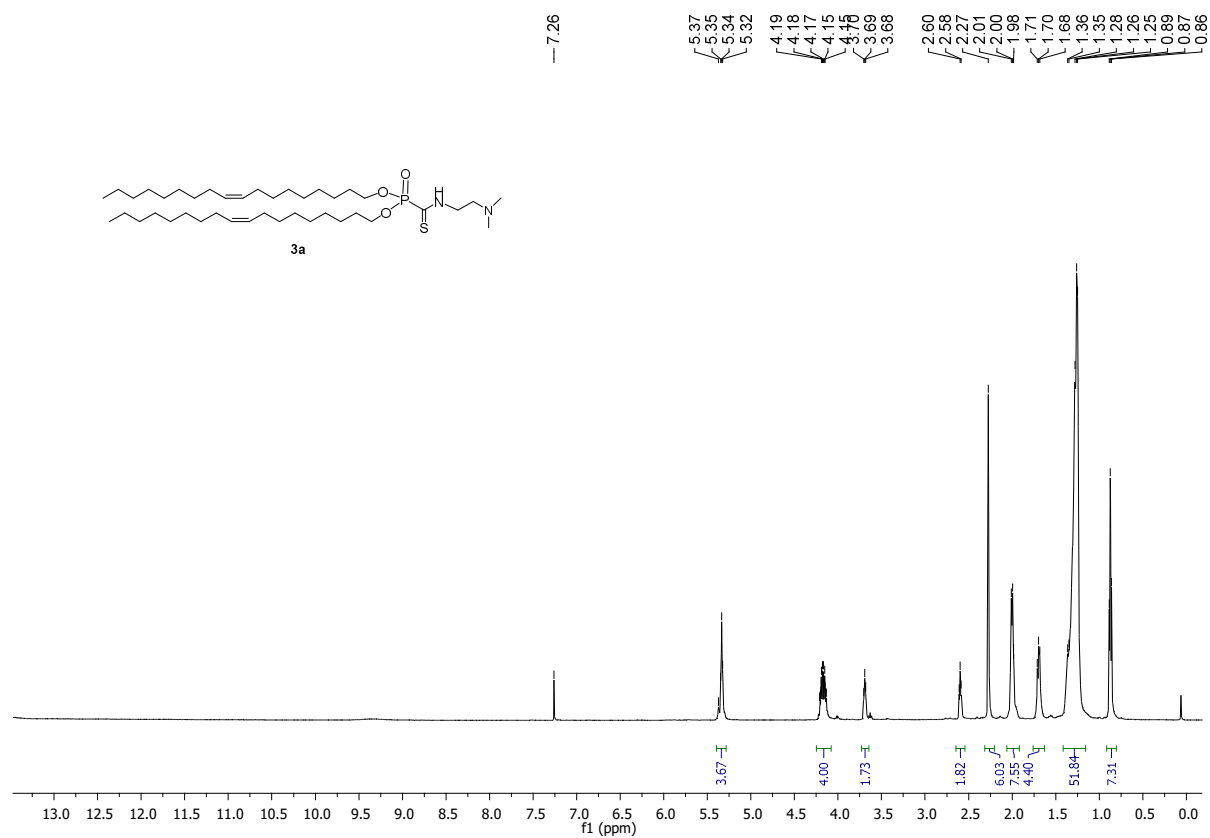

Figure S9.  $^1\text{H}$  NMR ( $\text{CDCl}_3$ ) of compound **3a**

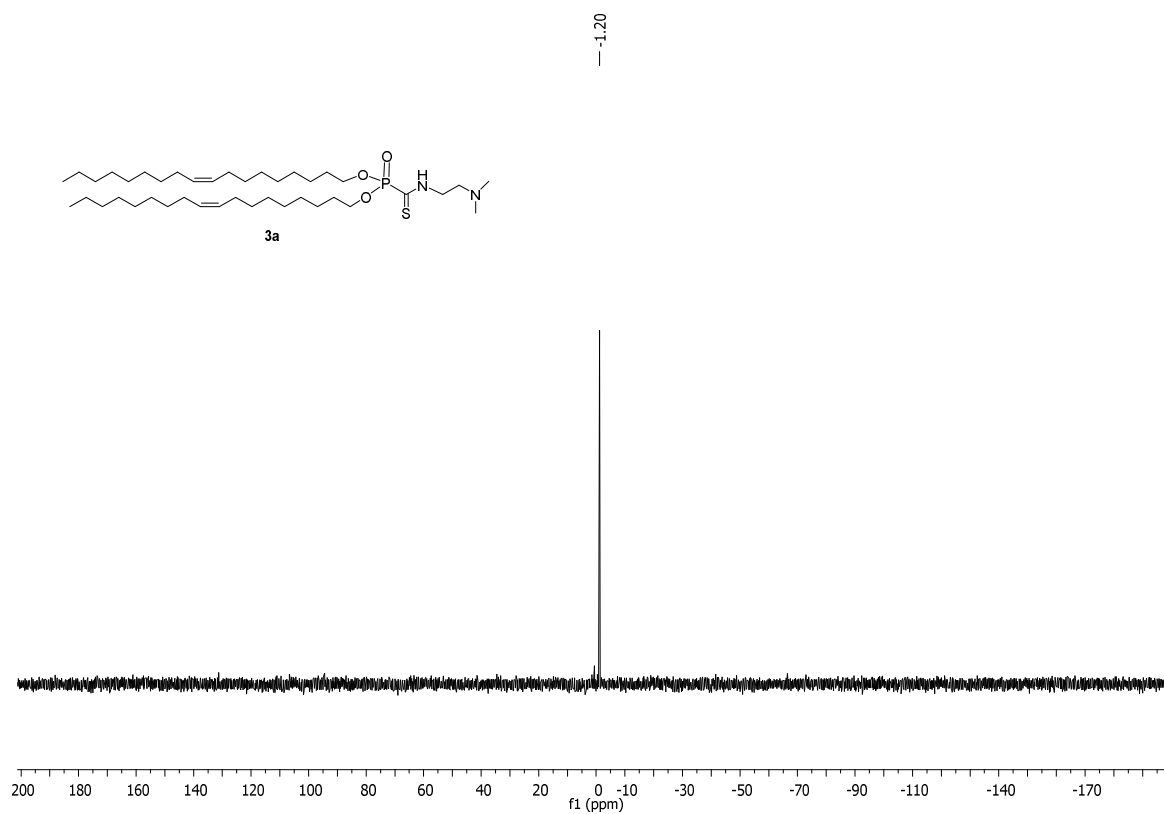

Figure S10.  $^{31}\text{P}$   $\{^1\text{H}\}$  ( $\text{CDCl}_3$ ) of compound **3a**

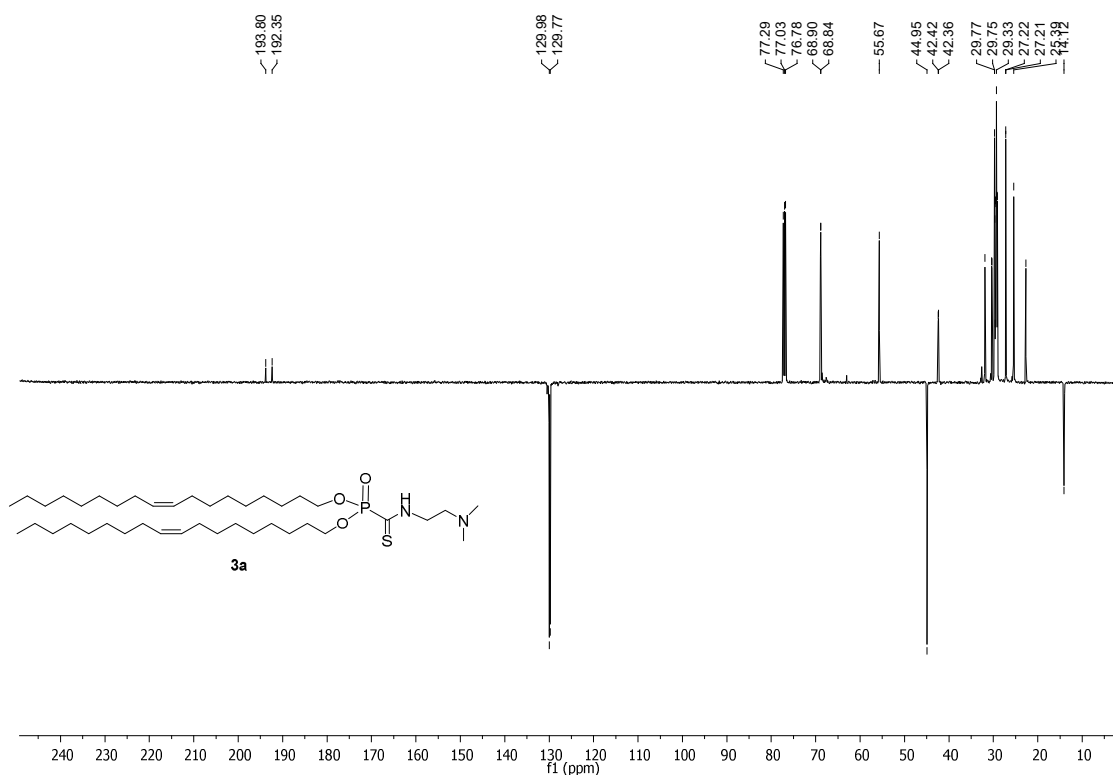

**Figure S11.**  $^{13}\text{C}$   $\{^1\text{H}\}$  ( $\text{CDCl}_3$ ) of compound **3a**

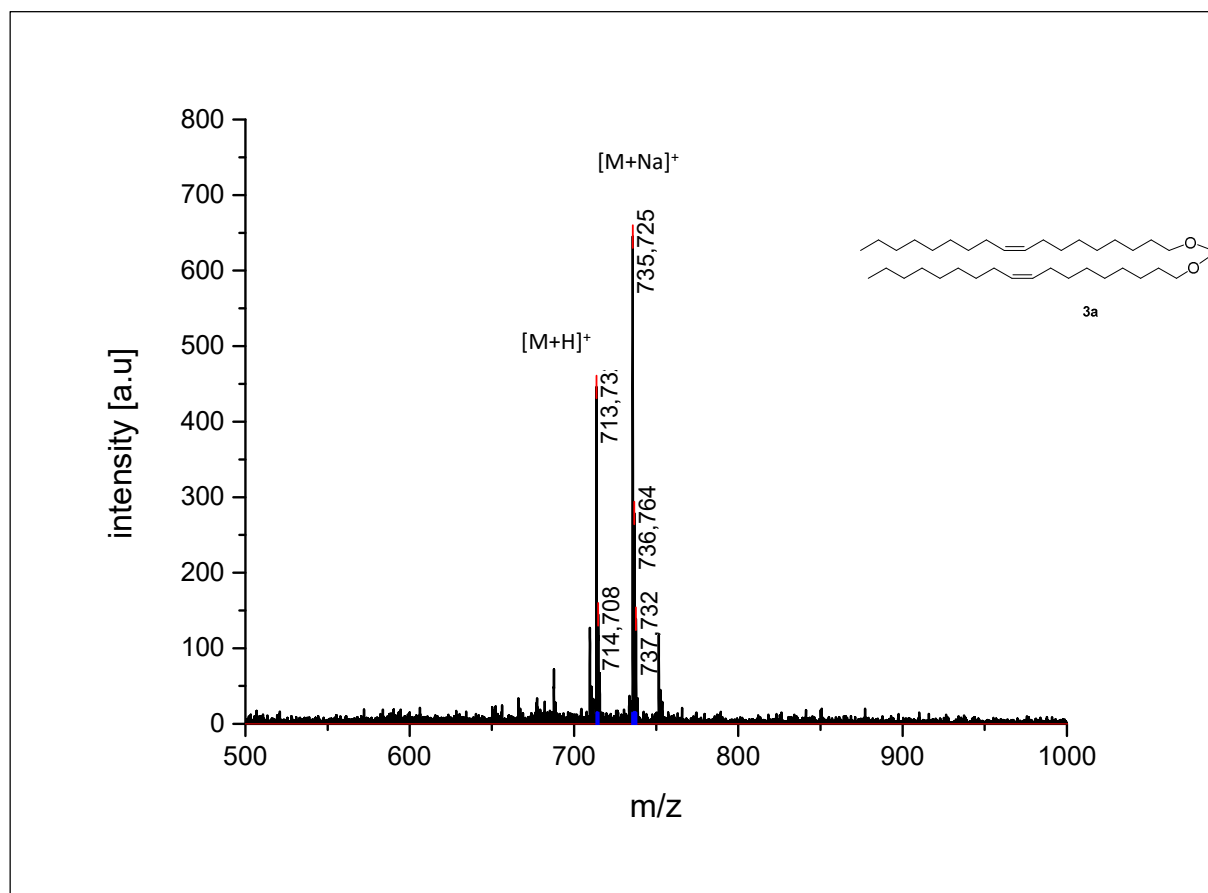

**Figure S12.** MALDI-TOF (matrix: HCCA) of compound **3a**.

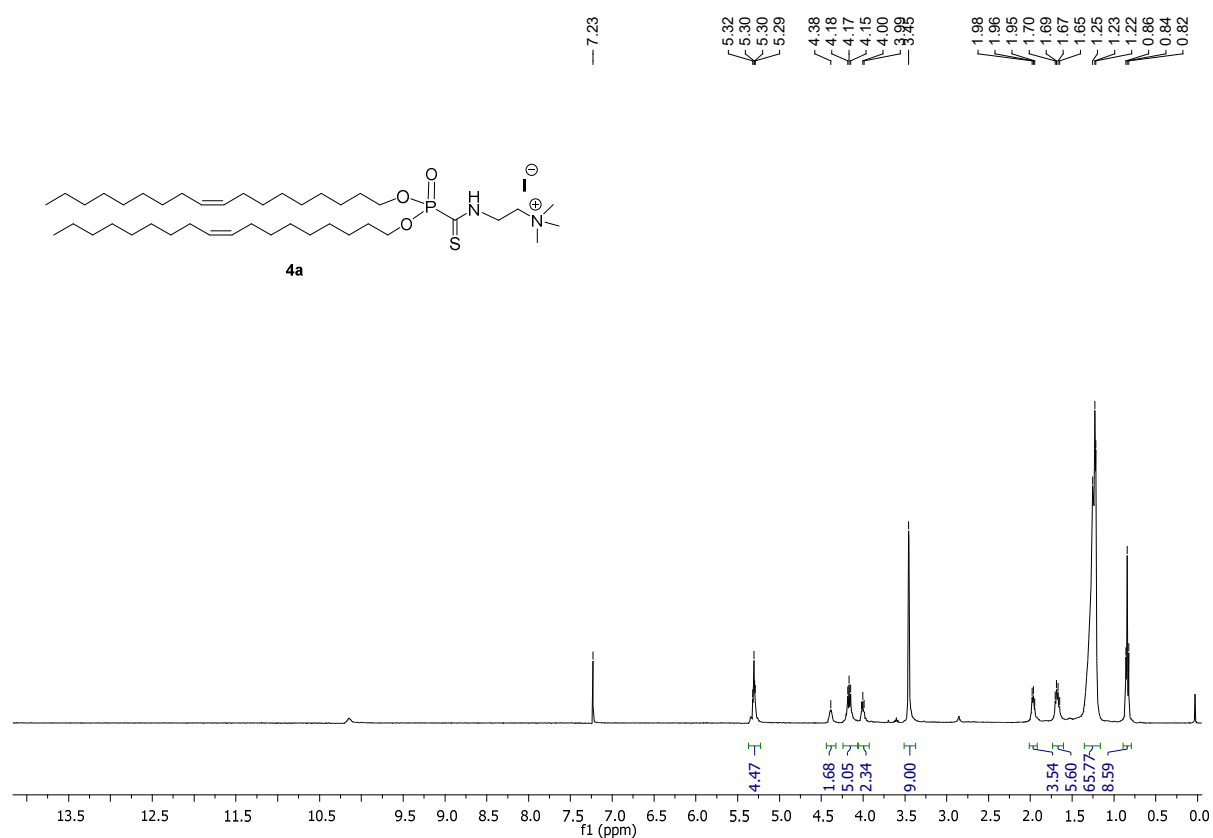

**Figure S13.**  $^1\text{H}$  NMR ( $\text{CDCl}_3$ ) of compound **4a**

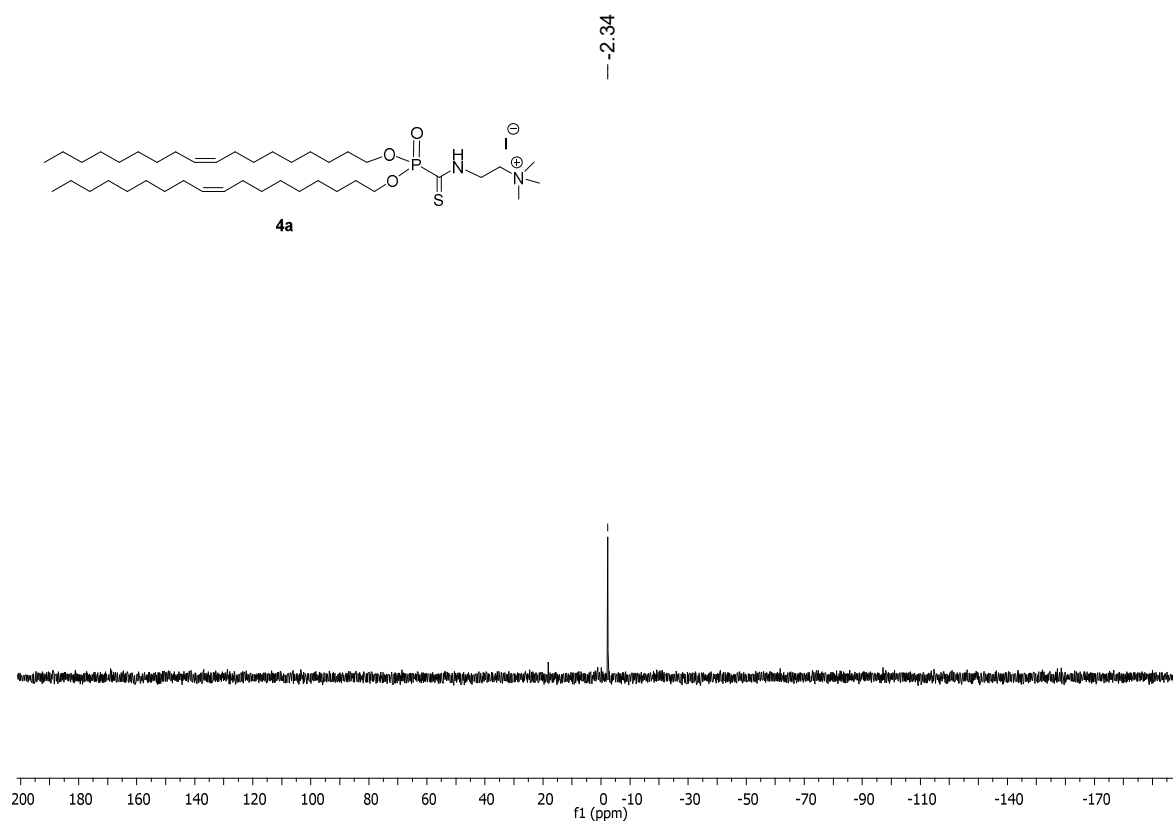

**Figure S14.**  $^{31}\text{P}$  { $^1\text{H}$ } ( $\text{CDCl}_3$ ) of compound **4a**



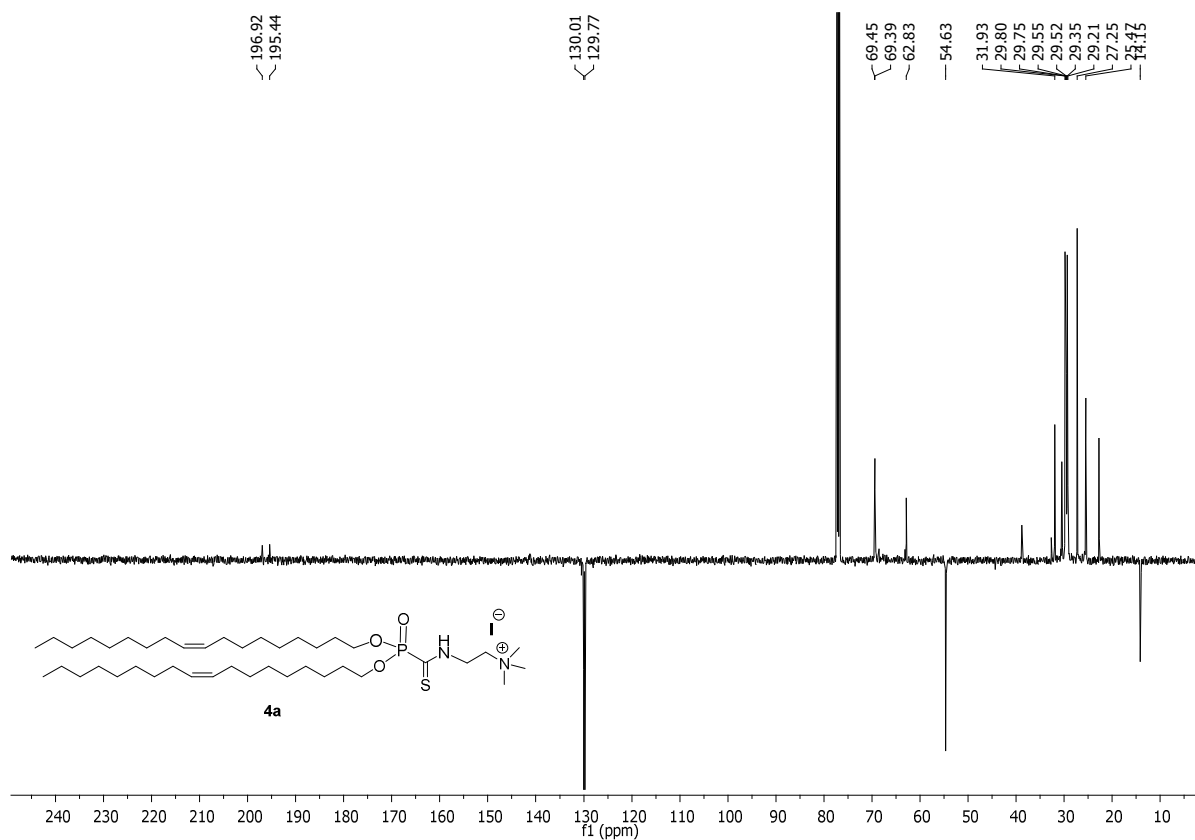

Figure S15.  $^{13}\text{C} \{^1\text{H}\}$  ( $\text{CDCl}_3$ ) of compound **4a**

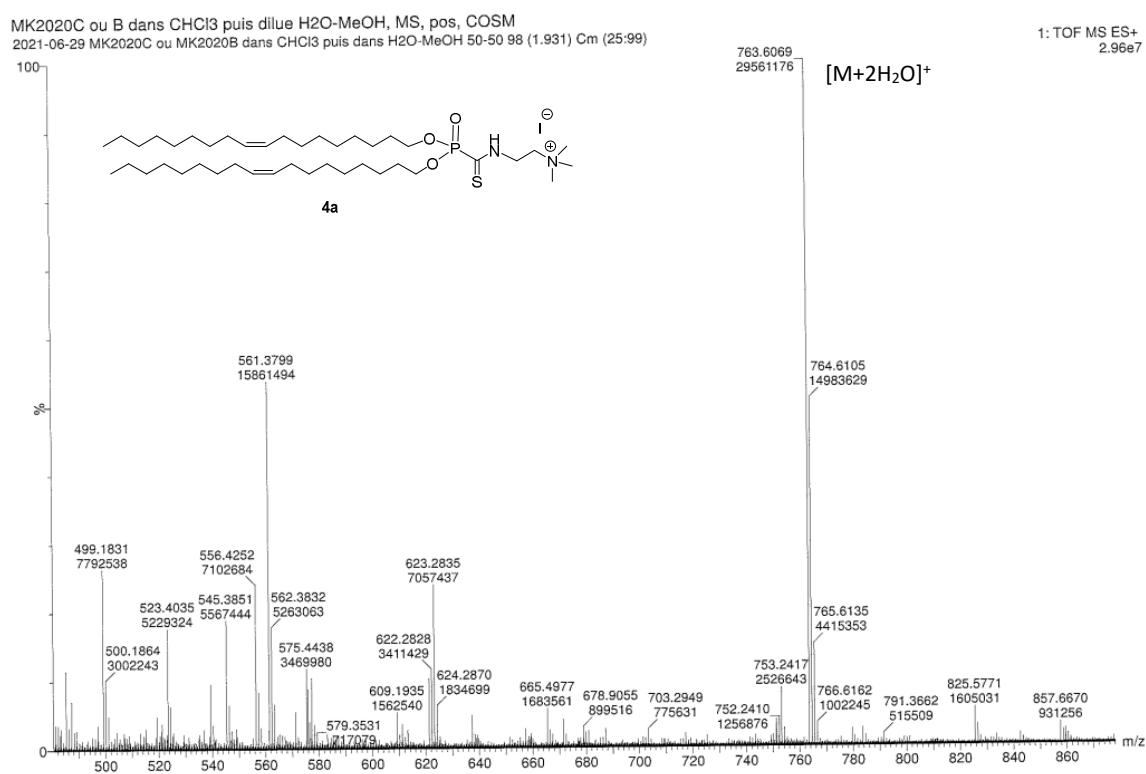

Figure S16. ESI-qTOF MS of compound **4a**

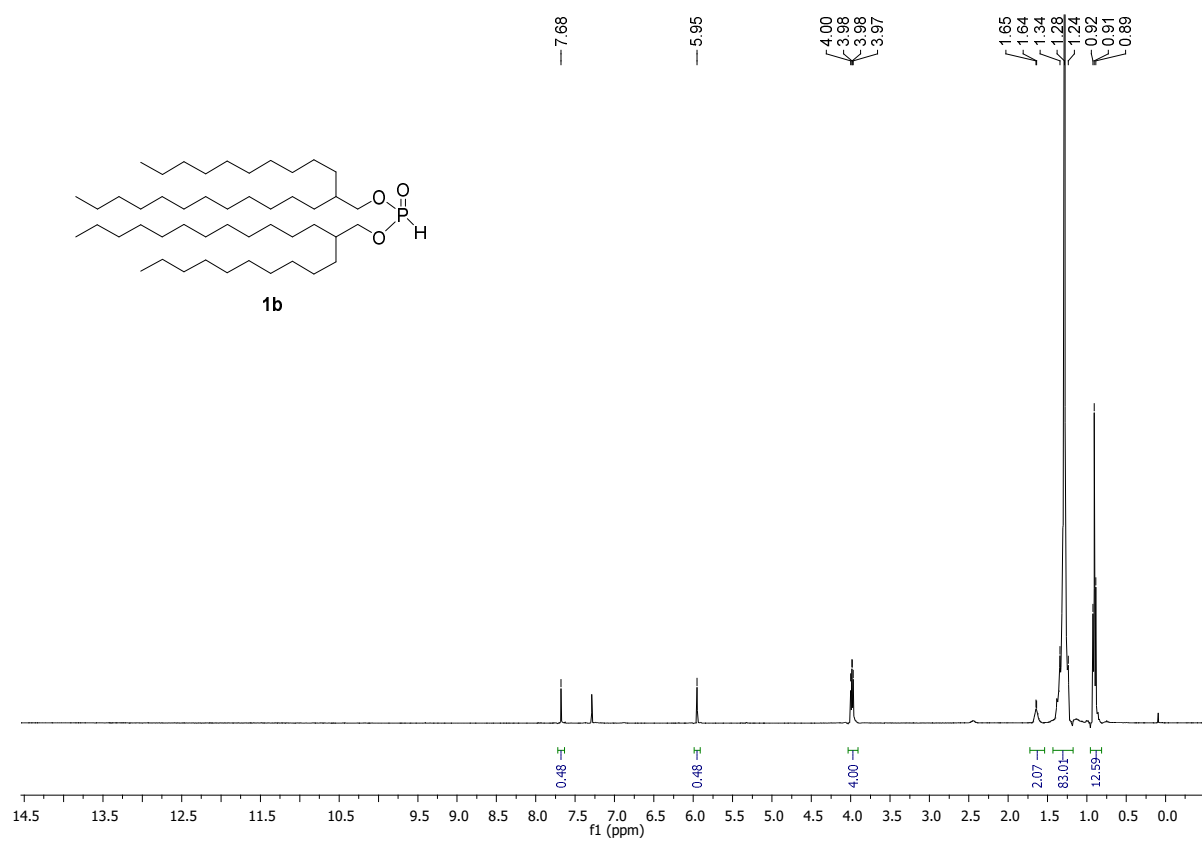

**Figure S17.**  $^1\text{H}$  NMR ( $\text{CDCl}_3$ ) of compound **1b**

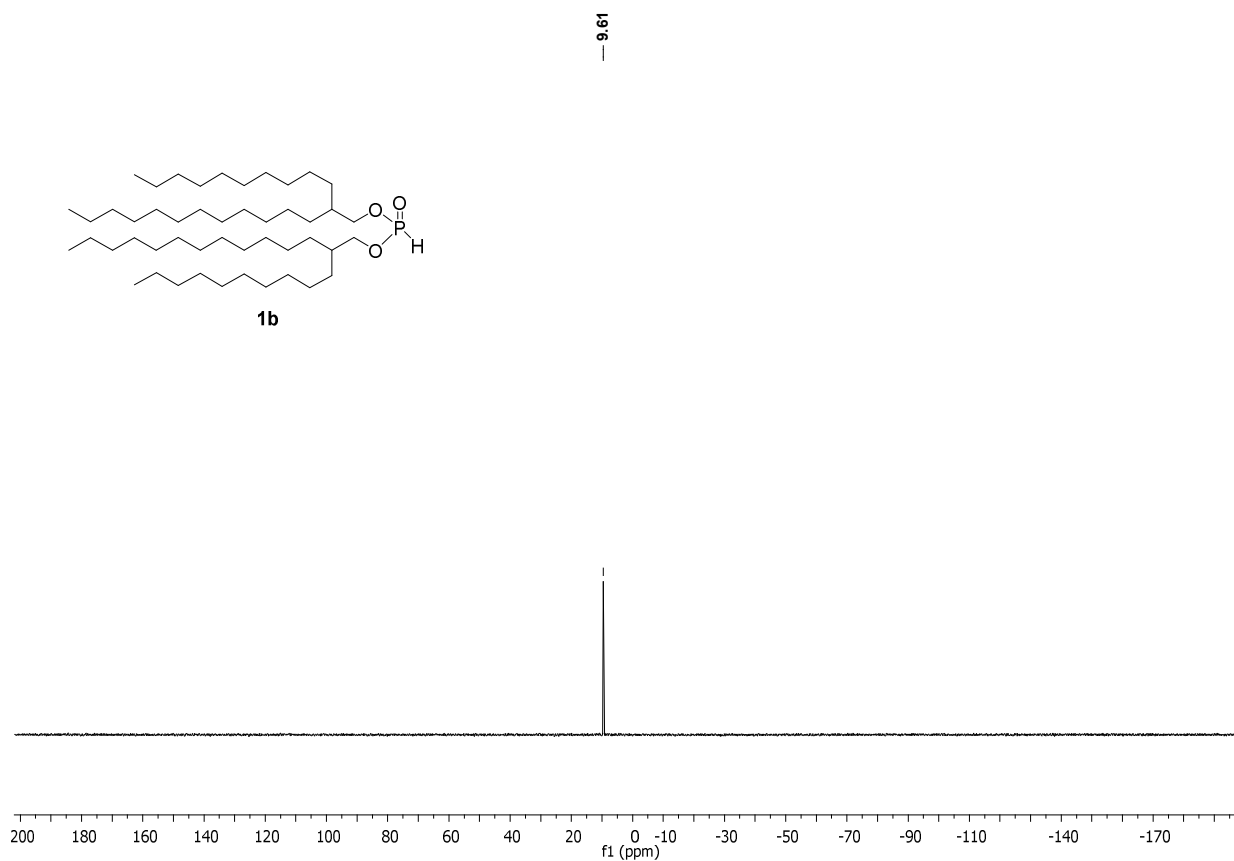

**Figure S18.**  $^{31}\text{P} \{^1\text{H}\}$  ( $\text{CDCl}_3$ ) of compound **1b**

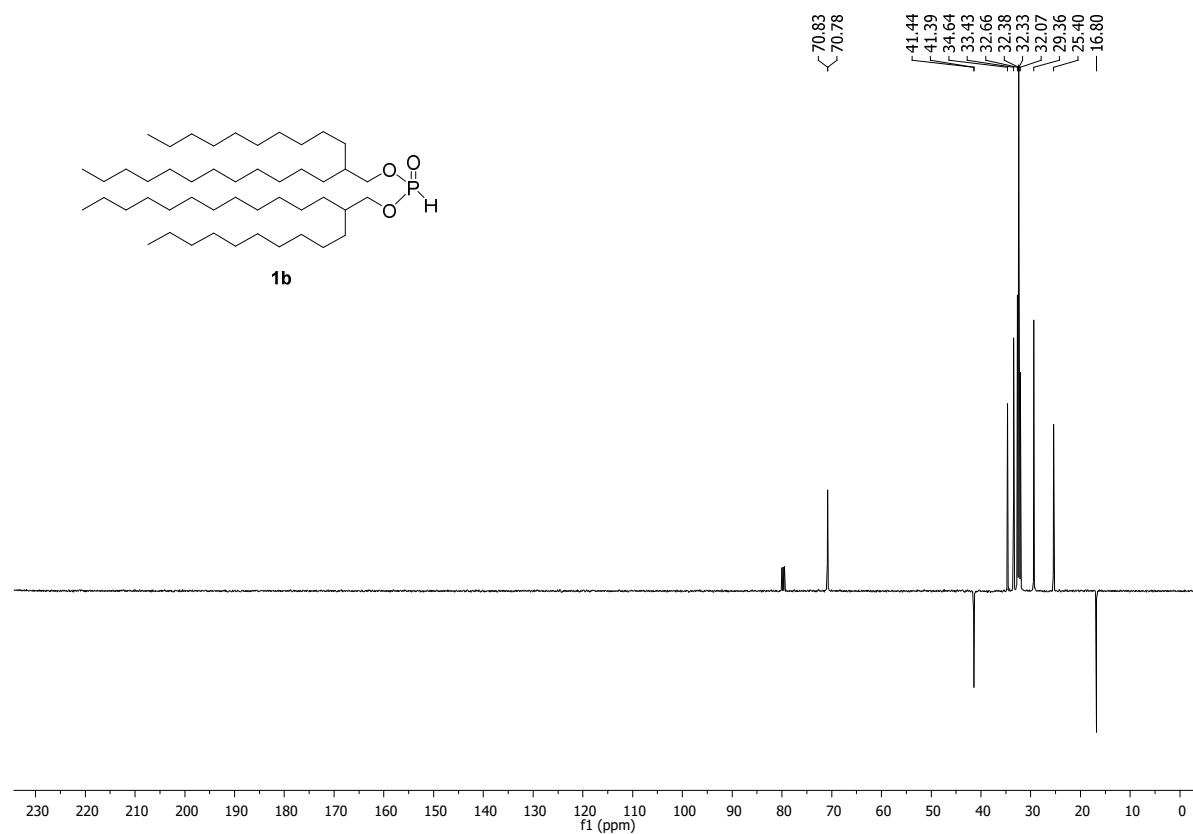

**Figure S19.**  $^{13}\text{C} \{^1\text{H}\}$  ( $\text{CDCl}_3$ ) of compound **1b**

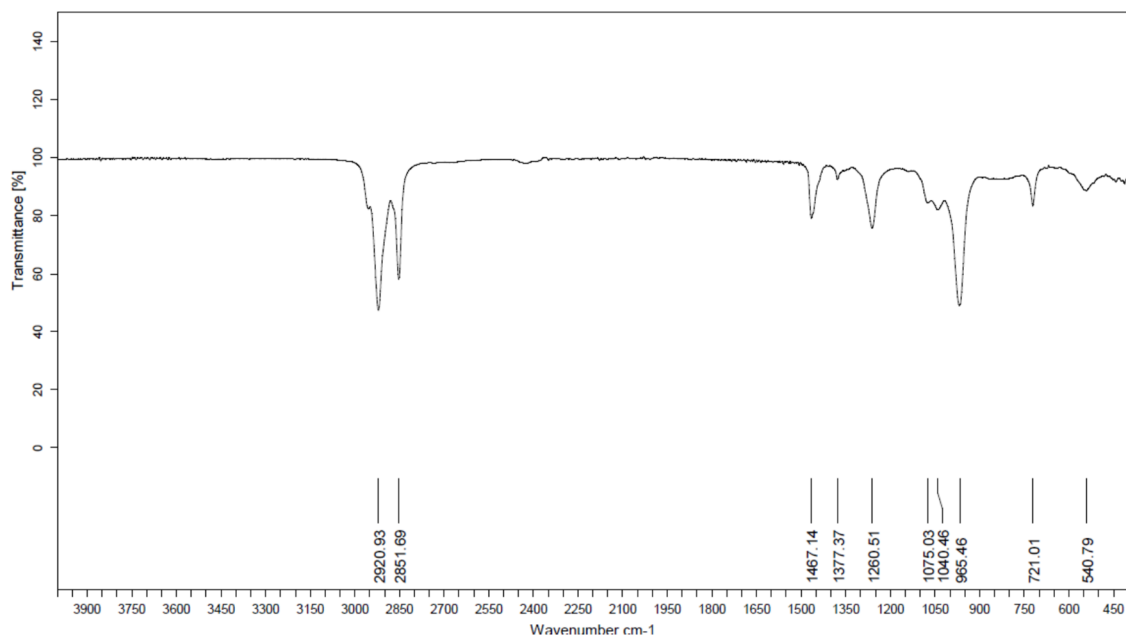

**Figure S20.** IR (ATR) of compound **1b**

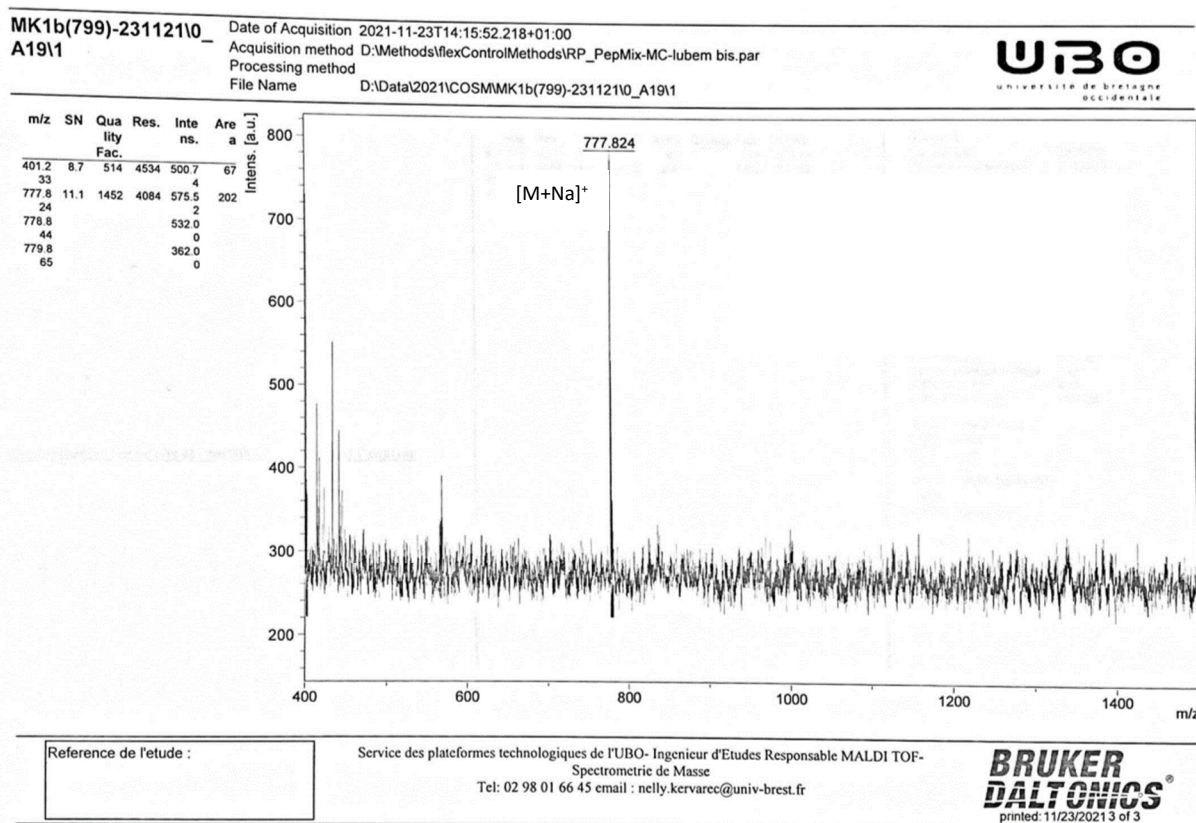

**Figure S21.** MALDI-TOF (matrix HCCA) of compound **1b**

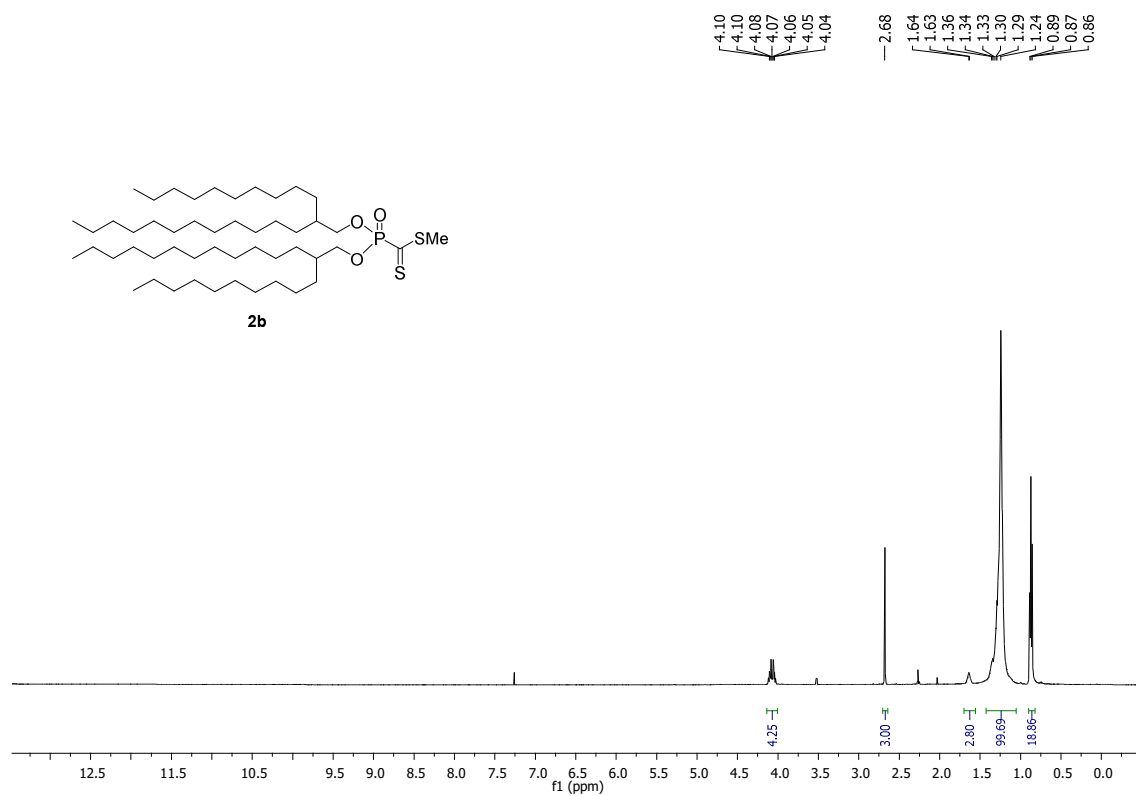

**Figure S22.**  $^1\text{H}$  NMR ( $\text{CDCl}_3$ ) of compound **2b**

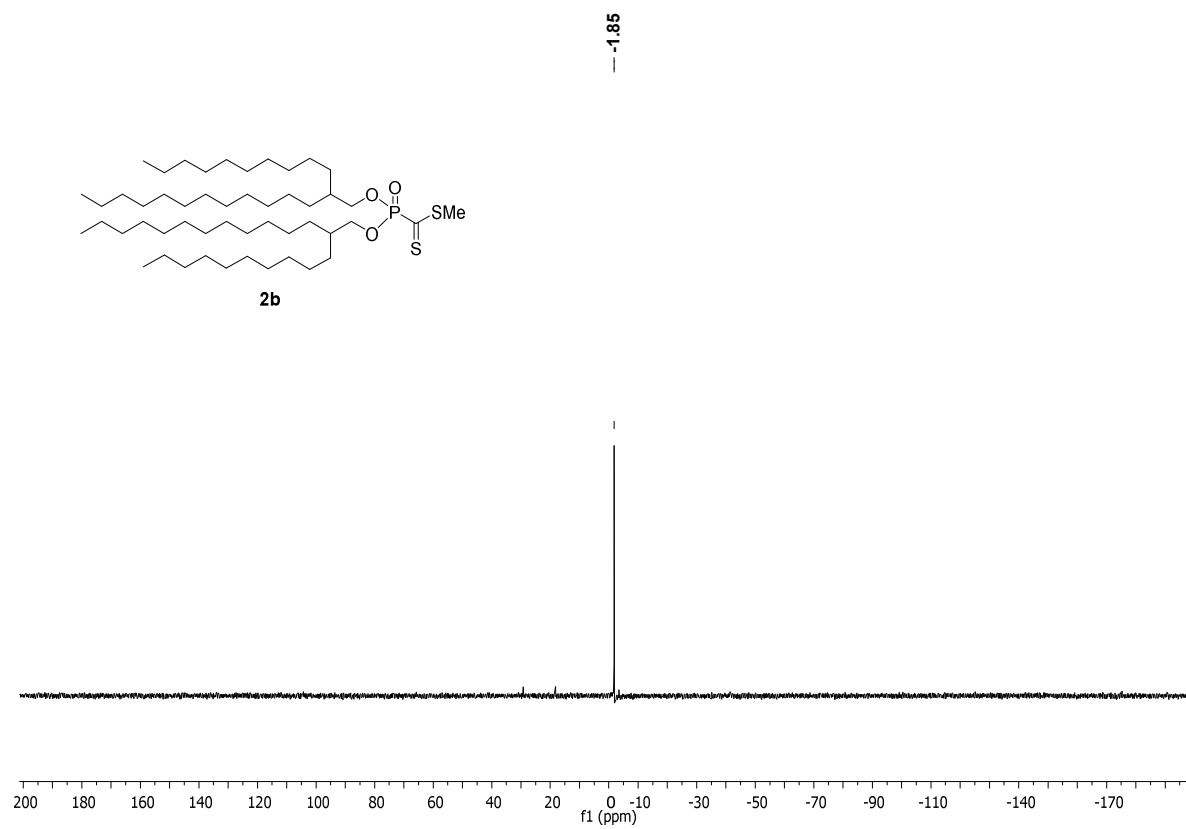

**Figure S23.**  $^{31}\text{P}$   $\{^1\text{H}\}$  ( $\text{CDCl}_3$ ) of compound **2b**

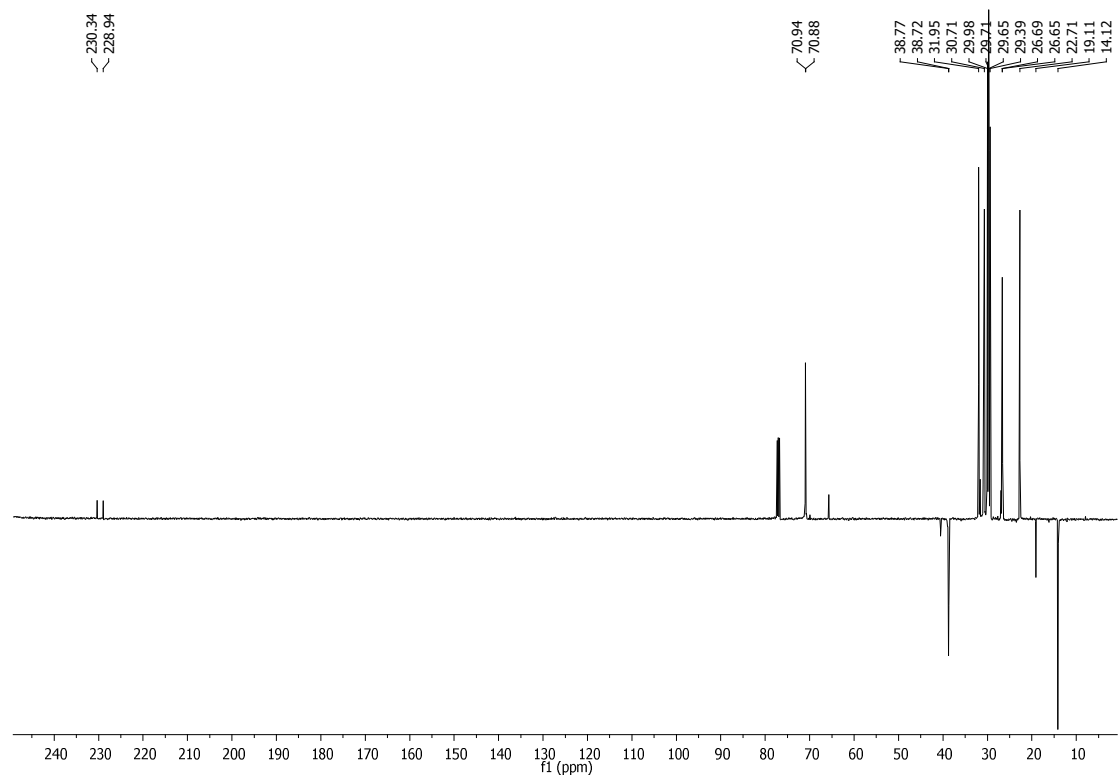

**Figure S24.**  $^{13}\text{C}$   $\{^1\text{H}\}$  ( $\text{CDCl}_3$ ) of compound **2b**

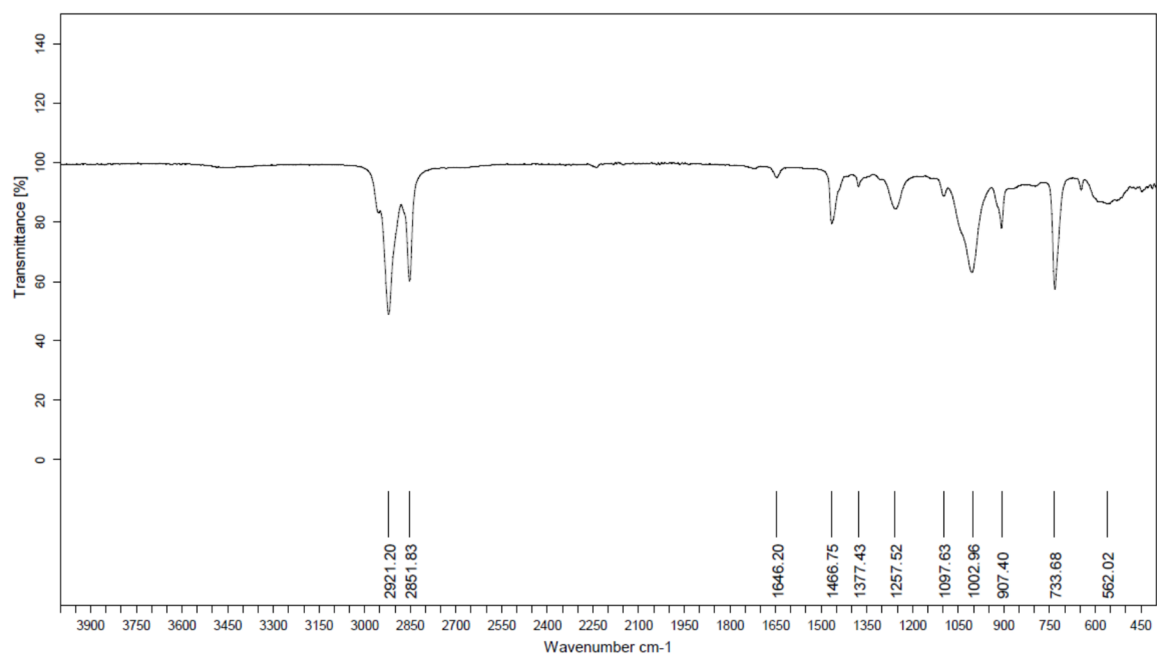

**Figure S25.** IR (ATR) of compound **2b**

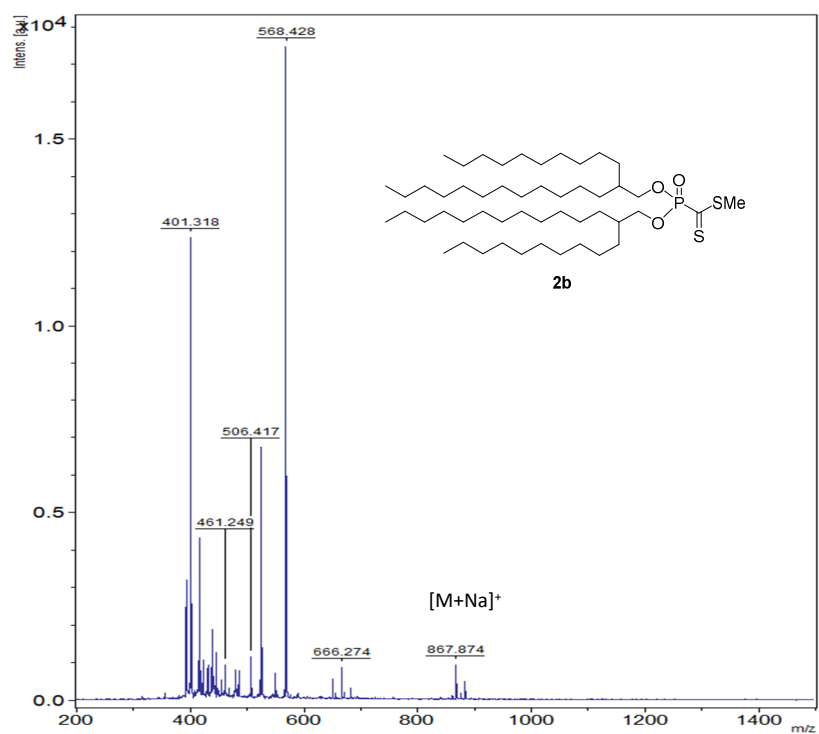

**Figure S26.** MALDI-TOF (matrix: HCCA) of compound **2b**

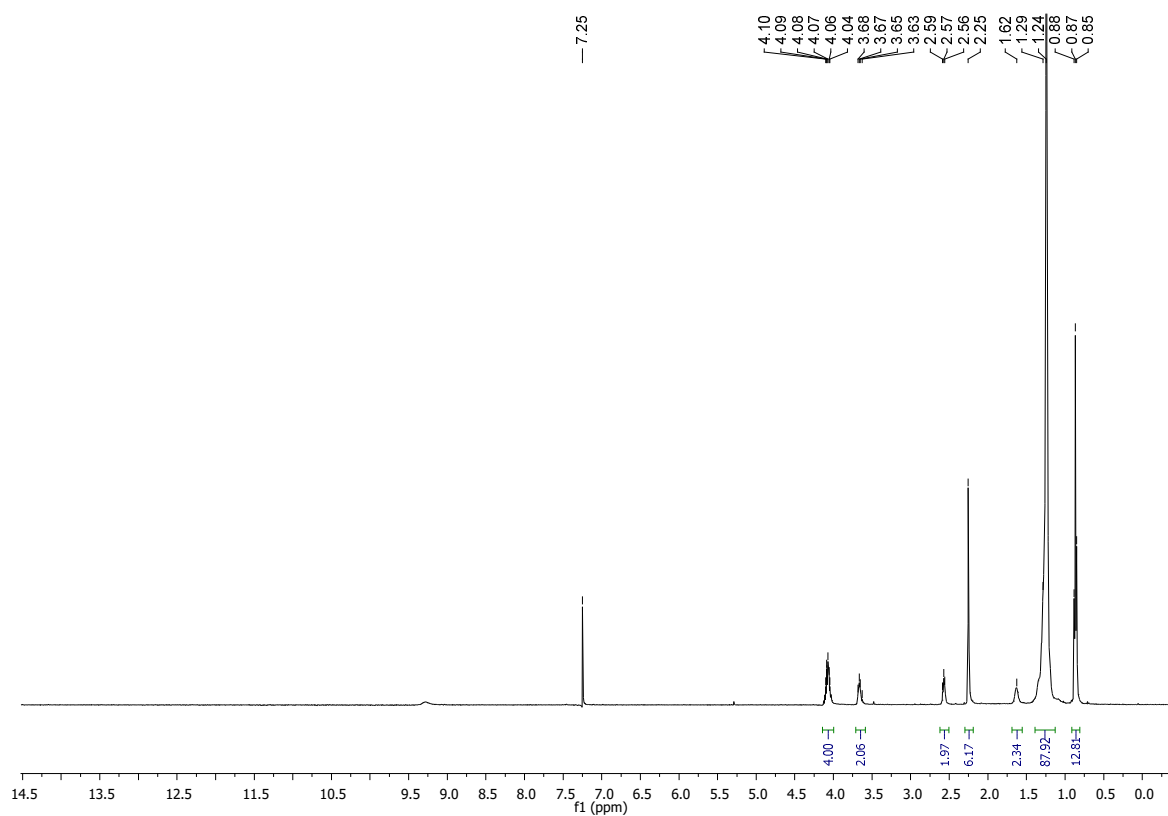

**Figure S27.** <sup>1</sup>H NMR ( $\text{CDCl}_3$ ) of compound **3b**

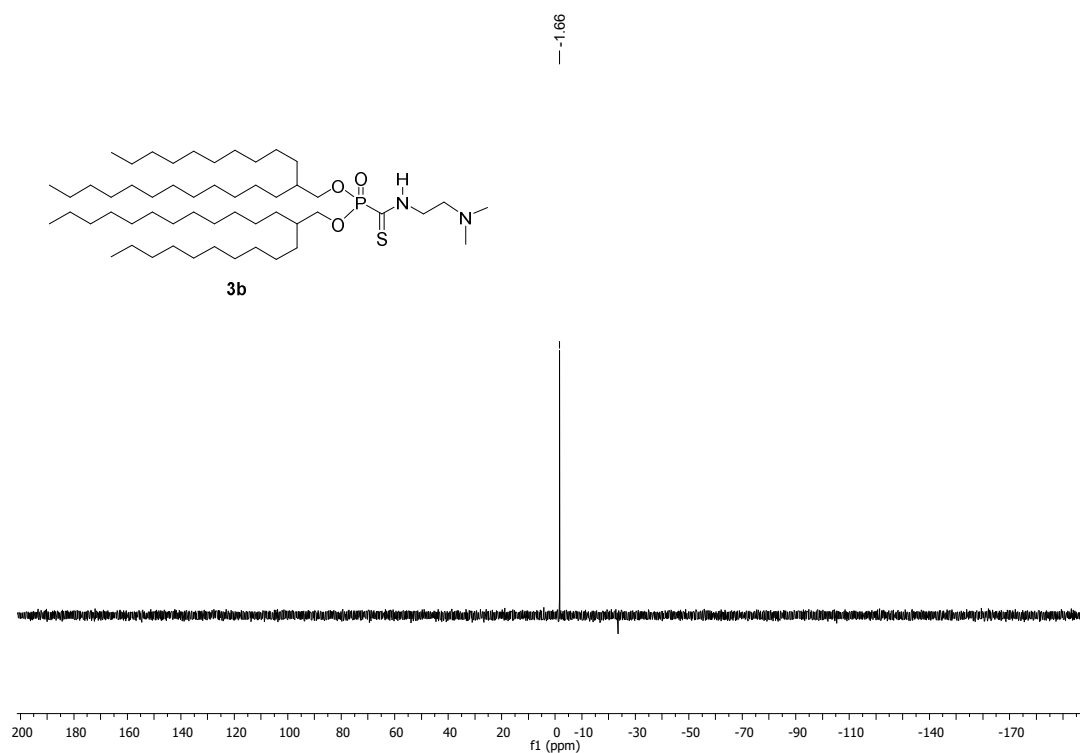

**Figure S28.**  $^{31}\text{P}$   $\{^1\text{H}\}$  (CDCl<sub>3</sub>) of compound **3b**

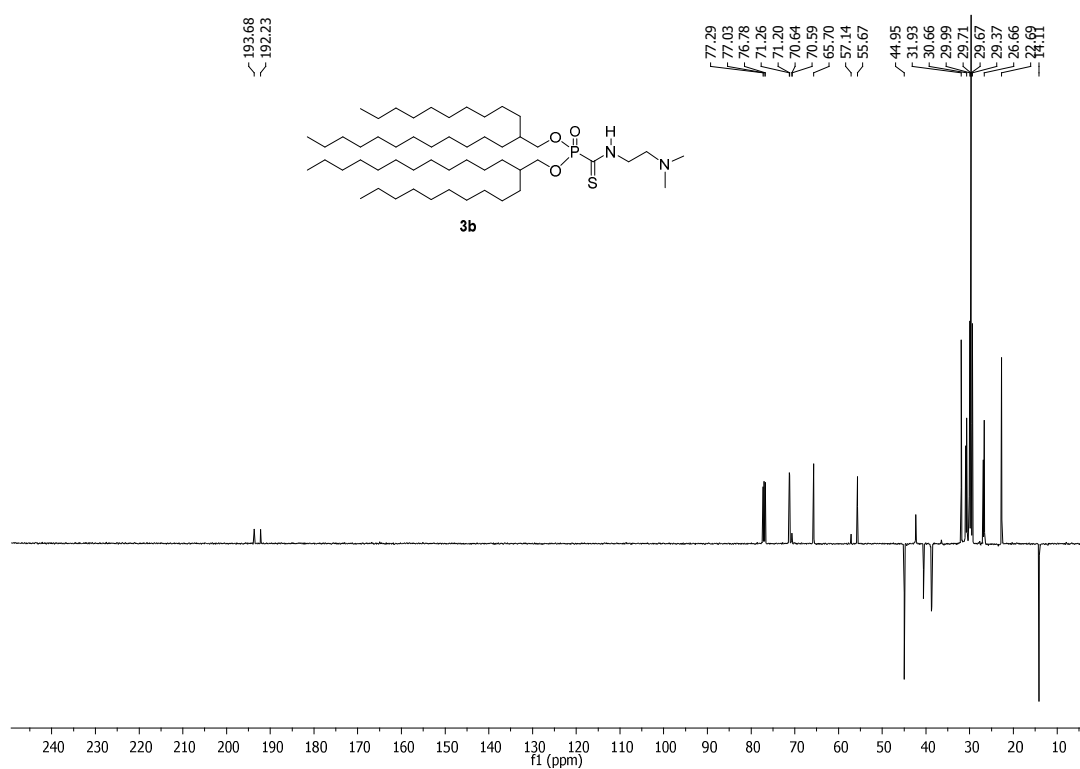

**Figure S29.**  $^{13}\text{C}$   $\{^1\text{H}\}$  (CDCl<sub>3</sub>) of compound **3b**



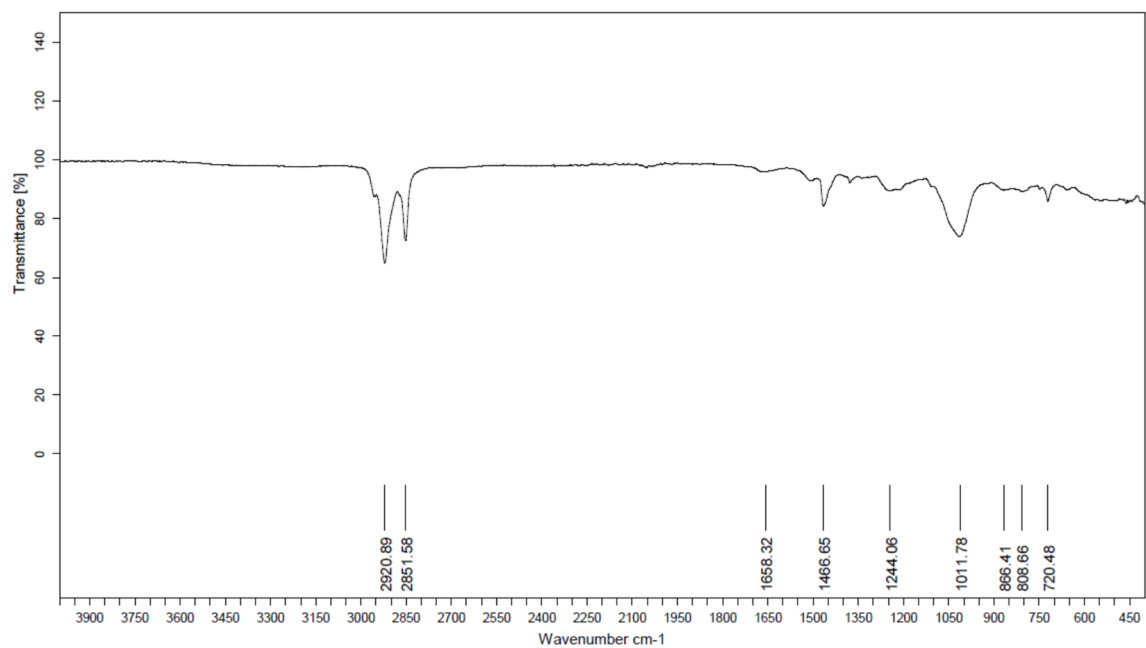

**Figure S30.** IR (ATR) of compound **3b**

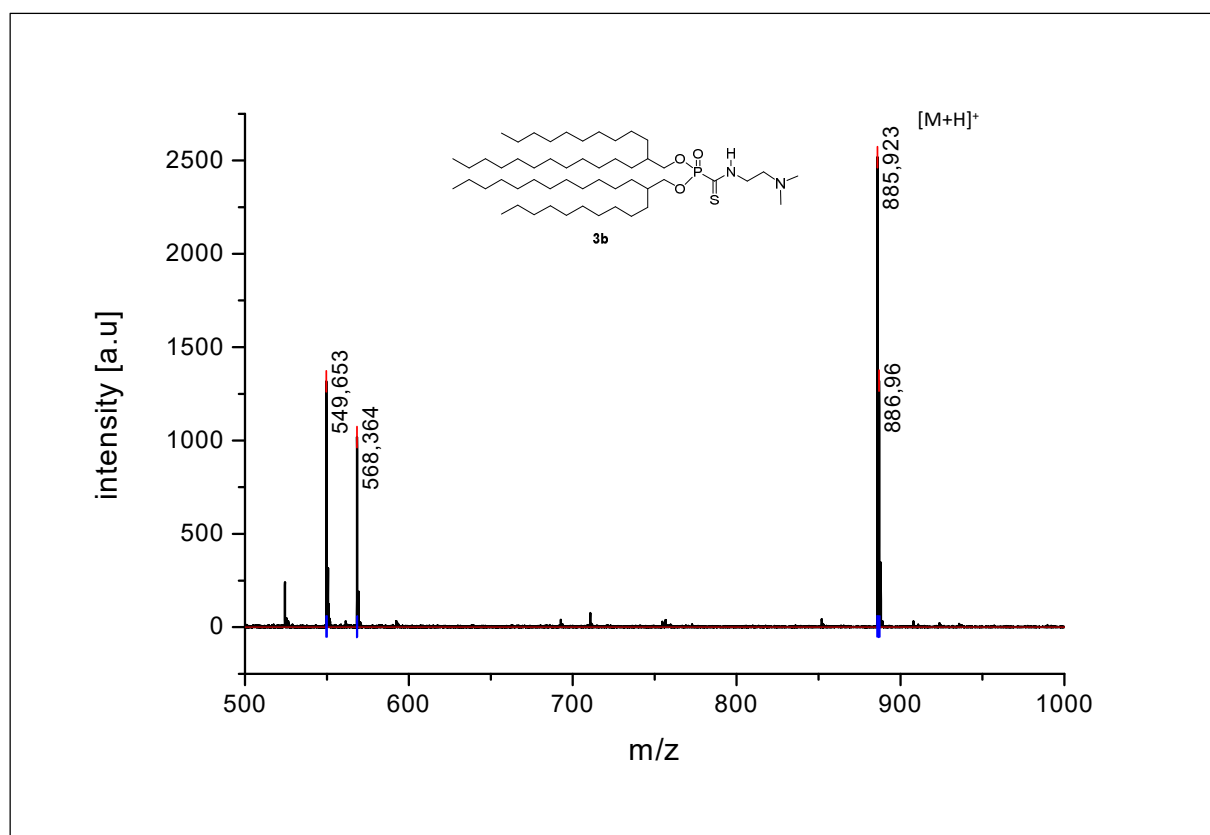

Figure S31. MALDI-TOF (matrix: HCCA) of compound **3b**

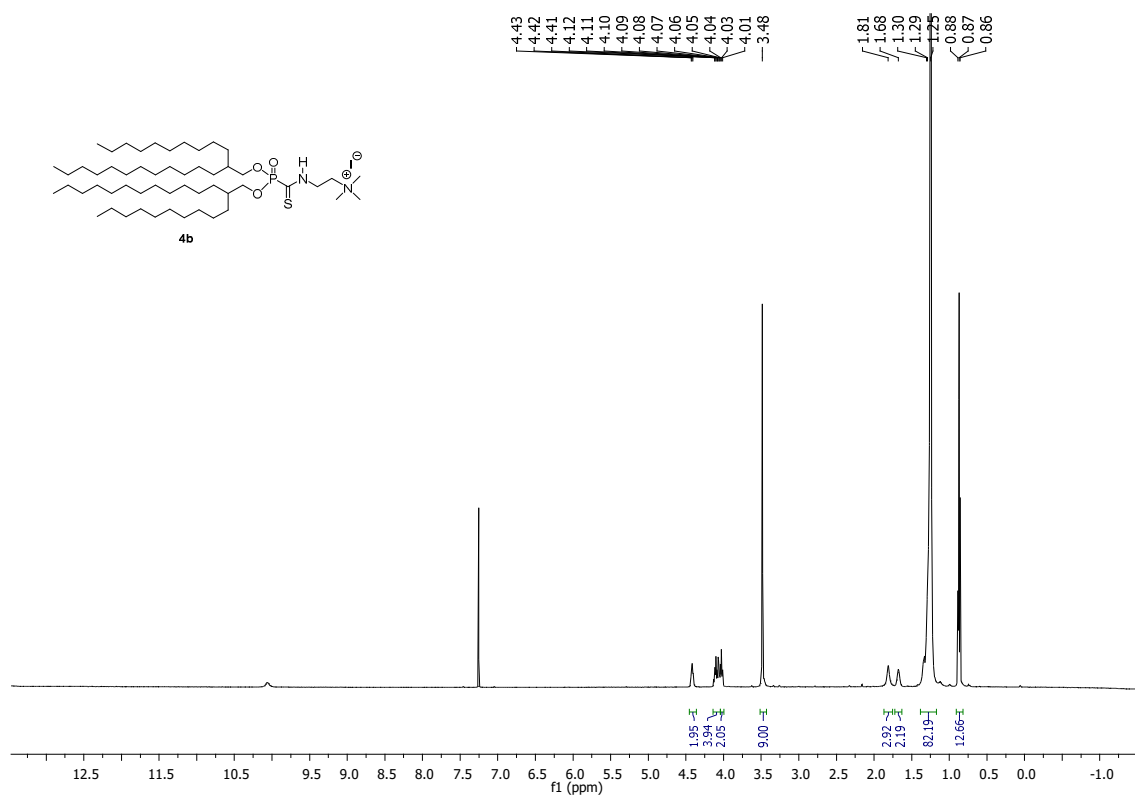

Figure S32. <sup>1</sup>H NMR (CDCl<sub>3</sub>) of compound **4b**

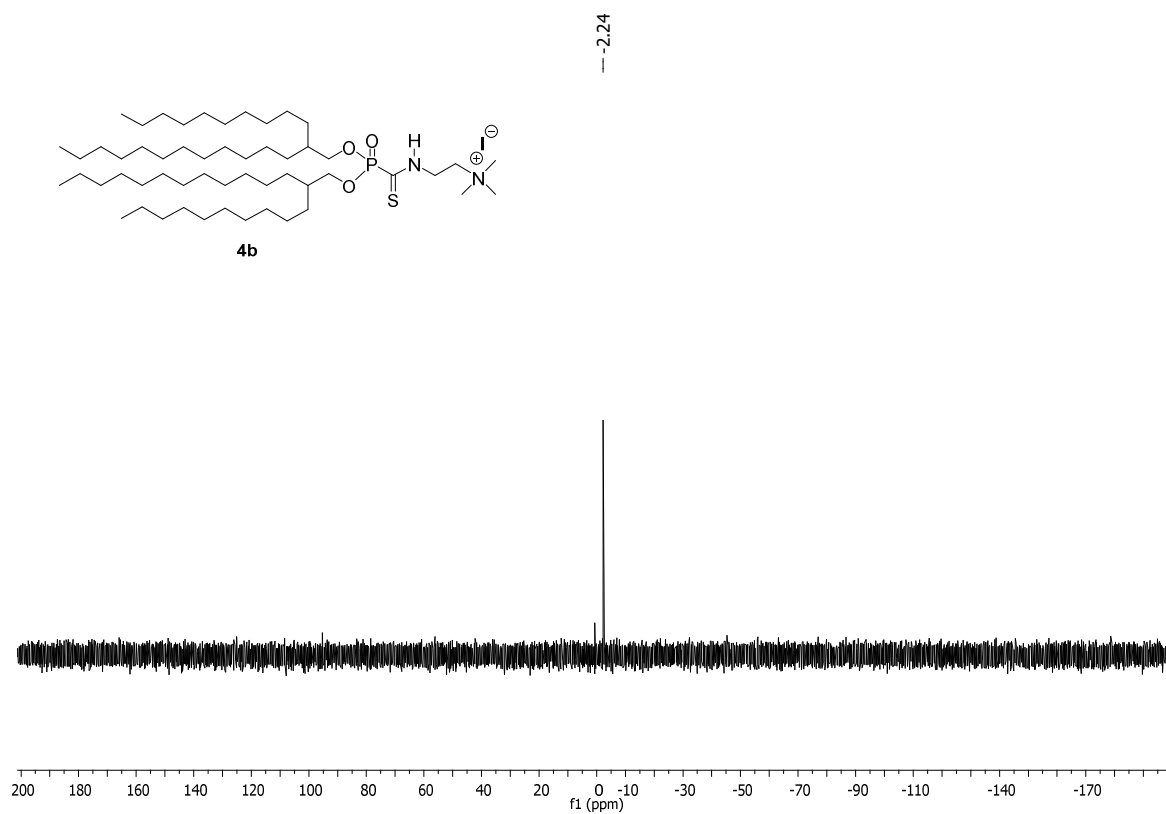

**Figure S33.**  $^{31}\text{P} \{^1\text{H}\}$  ( $\text{CDCl}_3$ ) of compound **4b**

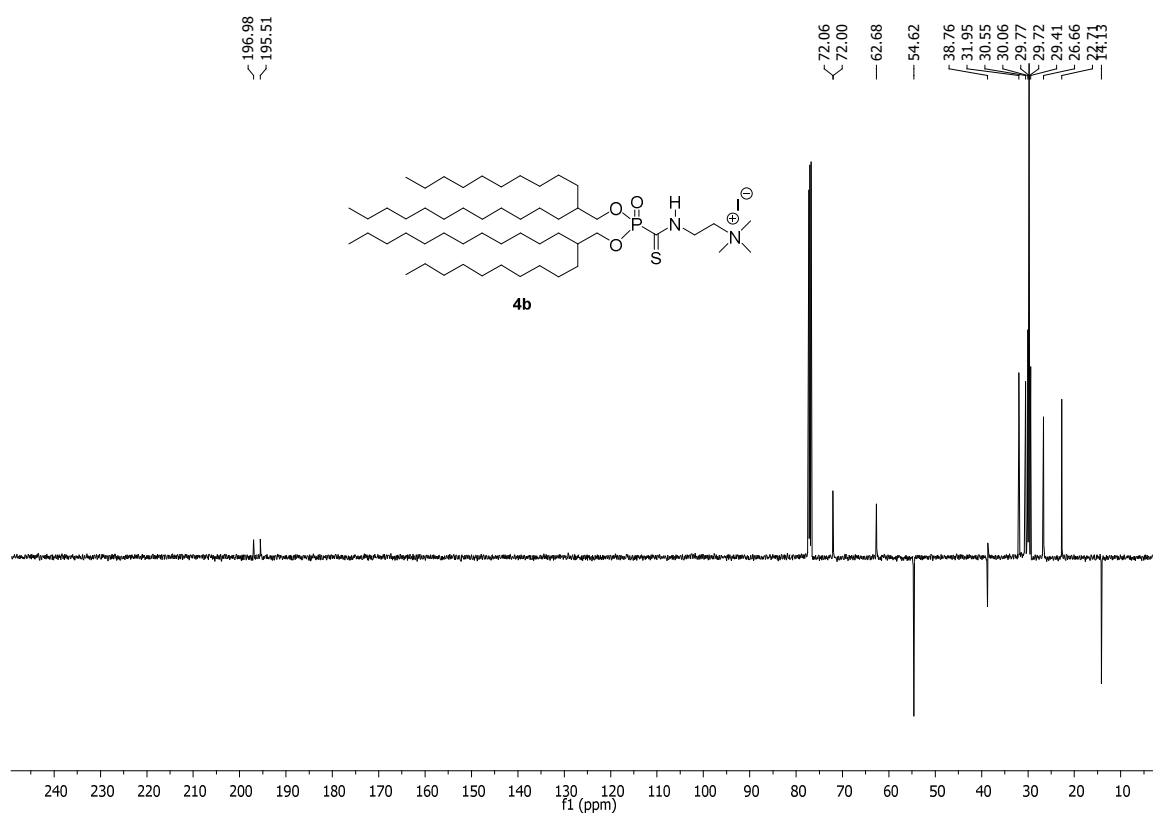

**Figure S34.**  $^{13}\text{C} \{^1\text{H}\}$  ( $\text{CDCl}_3$ ) of compound **4b**

MK2021C dans CHCl<sub>3</sub> puis dilue H<sub>2</sub>O-MeOH, MS, pos, COSM  
 2021-06-28 MK2021C dans CHCl<sub>3</sub> puis dans H<sub>2</sub>O-MeOH 50-50 15 (0.310) Cm (15:83)

1: TOF MS ES+  
 2.31e7

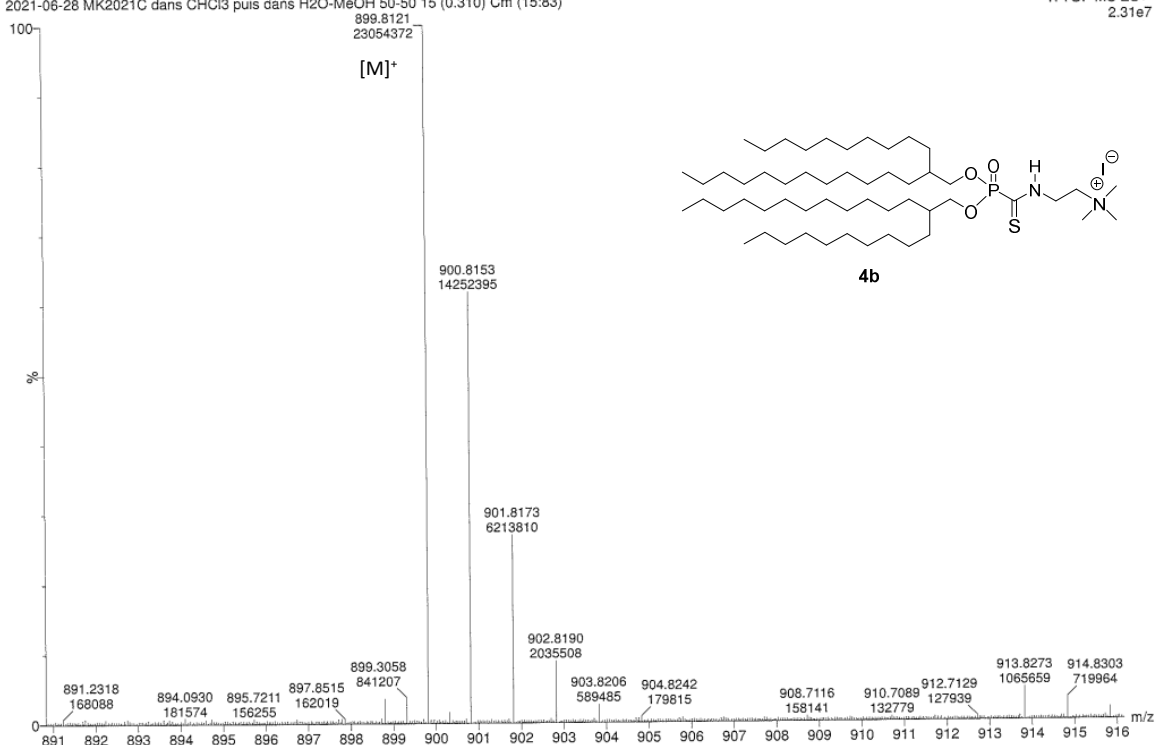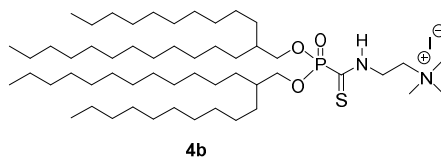

**Figure S35.** ESI-qTOF MS of compound **4b**

## 2. Stability of the liposomes

|              | DLS measurements (t=0) |      |                        | DLS measurements (t+ 5 months) <sup>a</sup> |      |                        |
|--------------|------------------------|------|------------------------|---------------------------------------------|------|------------------------|
|              | Size (nm)              | PDI  | Zeta Potential<br>(mV) | Size (nm)                                   | PDI  | Zeta Potential<br>(mV) |
| <b>LF1</b>   | 227 ±41                | 0.46 | 61 ±1.7                | 129 ±4                                      | 0.49 | 56 ±1                  |
| <b>LF2</b>   | 194 ±16                | 0.44 | 79 ±0.6                | 163 ±7                                      | 0.52 | 52 ±2                  |
| <b>LF3</b>   | 229 ±15                | 0.33 | 57 ±0.8                | 154 ±3                                      | 0.27 | 49 ±1                  |
| <b>BSV36</b> | 169 ±9                 | 0.24 | 58 ±0.06               | 112 ±2                                      | 0.40 | 62 ±3                  |
| <b>KLN47</b> | 126 ±7                 | 0.33 | 28 ±1.16               | 143 ±36                                     | 0.40 | 52 ±1                  |

a) The liposomes were stored at 4-6°C for 5 months. Before the measurements, the liposomal solutions were sonicated for 10 minutes at 38°C.

**Table S1:** Sizes and zeta potentials of the liposomes at t=0 and 5 months later.

### 3. DLS and zeta potential of lipoplexes

| Reference of the formulations | CR  | Size (nm)        | PDI             | Zeta Potentiel (mV) |
|-------------------------------|-----|------------------|-----------------|---------------------|
| <b>BSV36</b>                  | 0.7 | 155.7 +/- 1.704  | 0.230 +/- 0.015 | -22.1 +/- 0.808     |
| <b>BSV36</b>                  | 1   | 185.5 +/- 0.6658 | 0.265 +/- 0.006 | -13.3 +/- 1.01      |
| <b>BSV36</b>                  | 2   | 177.7 +/- 1.493  | 0.296 +/- 0.030 | 40.7 +/- 0.252      |
| <b>BSV36</b>                  | 4   | 136.7 +/- 1.422  | 0.295 +/- 0.032 | 47.7 +/- 0.208      |
| <b>KLN47</b>                  | 0.7 | 202.9 +/- 4.623  | 0.350 +/- 0.019 | -20.7 +/- 1.07      |
| <b>KLN47</b>                  | 1   | 198.4 +/- 5.164  | 0.357 +/- 0.028 | -22.2 +/- 0.208     |
| <b>KLN47</b>                  | 2   | 225.5 +/- 8.026  | 0.416 +/- 0.020 | -8.35 +/- 0.514     |
| <b>KLN47</b>                  | 4   | 162.4 +/- 1.258  | 0.278 +/- 0.021 | 46.6 +/- 1.77       |
| <b>LF1</b>                    | 0.7 | 130.0 +/- 4.851  | 0.308 +/- 0.028 | -17.8 +/- 0.643     |
| <b>LF1</b>                    | 1   | 138.3 +/- 0.3606 | 0.222 +/- 0.011 | -19.7 +/- 0.874     |
| <b>LF1</b>                    | 2   | 133.3 +/- 0.7371 | 0.159 +/- 0.019 | 47.9 +/- 1.34       |
| <b>LF1</b>                    | 4   | 117.2 +/- 1.079  | 0.200 +/- 0.008 | 51.4 +/- 0.651      |
| <b>LF2</b>                    | 0.7 | 181.7 +/- 5.173  | 0.295 +/- 0.026 | -20.0 +/- 6.92      |
| <b>LF2</b>                    | 1   | 188.3 +/- 0.8386 | 0.290 +/- 0.009 | -18.6 +/- 2.40      |
| <b>LF2</b>                    | 2   | 200.2 +/- 1.665  | 0.265 +/- 0.004 | -17.3 +/- 3.20      |
| <b>LF2</b>                    | 4   | 170.3 +/- 2.495  | 0.258 +/- 0.013 | 43.3 +/- 1.23       |
| <b>LF3</b>                    | 0.7 | 144.6 +/- 6.744  | 0.257 +/- 0.015 | -13.0 +/- 0.611     |
| <b>LF3</b>                    | 1   | 152.1 +/- 3.753  | 0.275 +/- 0.038 | -10.4 +/- 0.537     |
| <b>LF3</b>                    | 2   | 143.4 +/- 1.217  | 0.233 +/- 0.018 | -11.0 +/- 0.100     |
| <b>LF3</b>                    | 4   | 142.4 +/- 1.973  | 0.209 +/- 0.004 | -11.2 +/- 0.709     |

**Table S2:** Sizes and zeta potentials of the lipoplexes at different charges ratios.

#### 4. Gel electrophoresis

| <b><i>Condition</i></b> | <b><i>% complexed DNA</i></b> | <b><i>% Free DNA</i></b> |
|-------------------------|-------------------------------|--------------------------|
| <i>Naked DNA</i>        | 0.00%                         | 100.00%                  |
| <i>LF1 CR 0.7</i>       | 57.20%                        | 42.80%                   |
| <i>LF1 CR 1</i>         | 74.01%                        | 25.99%                   |
| <i>LF1 CR 2</i>         | 100.00%                       | 0.00%                    |
| <i>LF1 CR 4</i>         | 100.00%                       | 0.00%                    |
| <i>LF2 CR 0.7</i>       | 31.87%                        | 68.13%                   |
| <i>LF2 CR 1</i>         | 35.00%                        | 65.00%                   |
| <i>LF2 CR 2</i>         | 57.46%                        | 42.54%                   |
| <i>LF2 CR 4</i>         | 100.00%                       | 0.00%                    |
| <i>LF3 CR 0.7</i>       | 1.96%                         | 98.04%                   |
| <i>LF3 CR 1</i>         | 4.70%                         | 95.30%                   |
| <i>LF3 CR 2</i>         | 44.67%                        | 55.33%                   |
| <i>LF3 CR 4</i>         | 94.43%                        | 5.57%                    |
| <i>BSV36 CR 0.7</i>     | 45.36%                        | 54.64%                   |
| <i>BSV36 CR 1</i>       | 57.09%                        | 42.91%                   |
| <i>BSV36 CR 2</i>       | 96.28%                        | 3.72%                    |
| <i>BSV36 CR 4</i>       | 97.63%                        | 2.37%                    |
| <i>KLN47 CR 0.7</i>     | 16.25%                        | 83.75%                   |
| <i>KLN47 CR 1</i>       | 19.75%                        | 80.25%                   |
| <i>KLN47 CR 2</i>       | 69.34%                        | 30.66%                   |
| <i>KLN47 CR 4</i>       | 96.27%                        | 3.73%                    |

**Table S3** : Fraction of complexed DNA and free DNA after complexation process with the cationic lipids determined by densitometry analysis on the electrophoresis gel.

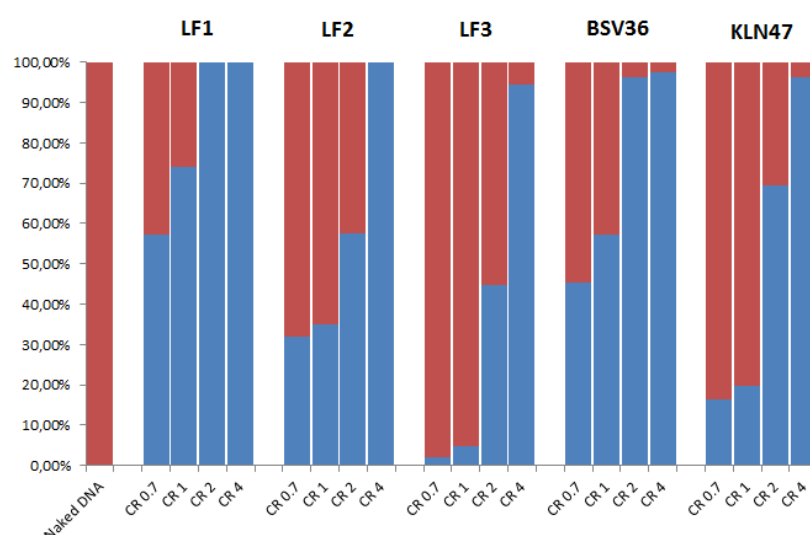

**Figure S36** Proportion of complexed and free DNA after complexation process with the cationic lipids determined by densitometry analysis on the electrophoresis gel. For each mixture tested, the fraction of free DNA is in red, while complexed DNA is in blue. Naked DNA was used to normalize each test as the quantity of DNA in all conditions was the same.
